# Supplementary material for: Win-win opportunities combining high yields with high multi-taxa biodiversity in tropical agroforestry
Source: Springer Nature journal article supplement (doi:10.1038/s41467-022-30866-8), 2022-07-26
Supplement: 41467_2022_30866_MOESM1_ESM.pdf [file 41467_2022_30866_MOESM1_ESM.pdf]

1 **Supplementary Information**

2 **Manuscript title:** Win-win opportunities combining high yields with high multi-taxa biodiversity in  
3 tropical agroforestry

4 **Table of contents:**

| <b>Number</b>          | <b>Content</b>                                                                                           |
|------------------------|----------------------------------------------------------------------------------------------------------|
| Supplementary Table 1  | Effect of vanilla yield kg/ha on (endemic) mean normalized richness in interaction with land-use history |
| Supplementary Table 2  | Effect of vanilla yield kg/ha on (endemic) species richness in interaction with land-use history         |
| Supplementary Table 3  | Species richness comparison between old-growth forest & forest-derived vanilla agroforest                |
| Supplementary Table 4  | Tukey multiple comparisons of means for all land-use-pairs of mean normalized richness                   |
| Supplementary Table 5  | Test results of Kruskal-Wallis test and pairwise Wilcoxon-test for all land-use-pairs                    |
| Supplementary Table 6  | Tukey multiple comparisons of means for all land-use-pairs of species richness                           |
| Supplementary Table 7  | Alpha, gamma & beta diversity                                                                            |
| Supplementary Table 8  | Species richness comparison between forest fragment & forest-derived vanilla agroforest                  |
| Supplementary Table 9  | Species richness comparison between fallow & fallow-derived vanilla agroforest                           |
| Supplementary Table 10 | Sampling coverage for each taxon                                                                         |
| Supplementary Table 11 | Species composition - pairwise comparisons                                                               |
| Supplementary Table 12 | Overview of vanilla plant/yield/agroforest statistics                                                    |
| Supplementary Table 13 | Determinants of vanilla yield (model comparison)                                                         |
| Supplementary Table 14 | Determinants of vanilla yield (final model)                                                              |
| Supplementary Table 15 | Determinants of species richness (model comparison)                                                      |
| Supplementary Table 16 | Determinants of endemic species richness (model comparison)                                              |
| Supplementary Table 17 | Determinants of species richness in 30 vanilla agroforests (final model)                                 |
| Supplementary Table 18 | Determinants of endemic species richness in 30 vanilla agroforests (final model)                         |
| Supplementary Table 19 | Icon attribution                                                                                         |
| Supplementary Table 20 | Mean, standard deviation, min and max value of all environmental and management variables                |
| Supplementary Figure 1 | Study design overview                                                                                    |

|                         |                                                                                |
|-------------------------|--------------------------------------------------------------------------------|
| Supplementary Figure 2  | Exemplary photos of land-use types                                             |
| Supplementary Figure 3  | Species accumulation curves                                                    |
| Supplementary Figure 4  | Species composition of the five land-use types                                 |
| Supplementary Figure 5  | Vanilla yield kg/ha depending on environmental and management variables        |
| Supplementary Figure 6  | Vanilla yield depending on land-use history                                    |
| Supplementary Figure 7  | (Endemic) species richness depending on environmental and management variables |
| Supplementary Figure 8  | Vanilla pied design on plot                                                    |
| Supplementary Figure 9  | Correlation matrix for all pairs of soil variables                             |
| Supplementary Figure 10 | PCA based on eight soil characteristics                                        |
| Supplementary Figure 11 | Correlation matrix for all pairs of environmental and management variables     |
| Supplementary Figure 12 | Pollination labour input predicted by number of household members.             |

6 **Supplementary Table 1:** Linear mixed effect model (LMM) analyzing the effect of vanilla yield kg/ha  
7 (scaled & sqrt transformed) in interaction with land-use history on 1) mean normalized richness  
8 (trees (n=28), herbaceous plants (n=30), birds (n=30), amphibians (n=30), reptiles (n=30), butterflies  
9 (n=30) and ants (n=30)) and 2) mean normalized endemic richness (endemic richness of trees (n=28),  
10 herbaceous plants (n=30), birds (n=30), amphibians (n=30), reptiles (n=30), butterflies (n=30) and  
11 ants (n=30)). The p-values are based on a two-sided t-test testing whether the mean is different from  
12 0. Significant effects are highlighted in bold. Digits were rounded to the third decimal place. Data  
13 used from 30 vanilla agroforests (20 fallow-derived vanilla agroforests, 10 forest-derived vanilla  
14 agroforests).

15

| <b>1) Mean normalized richness</b>         | <b>Estimate</b> | <b>Std. Error</b> | <b>df</b> | <b>t-value</b> | <b>p-value</b>   |
|--------------------------------------------|-----------------|-------------------|-----------|----------------|------------------|
| Intercept                                  | 0.131           | 0.005             | 11.020    | 24.603         | <0.001           |
| Vanilla yield kg/ha                        | -0.007          | 0.005             | 25.783    | -1.425         | 0.166            |
| Land-use history (VFOR)                    | 0.047           | 0.009             | 25.945    | 5.077          | <b>&lt;0.001</b> |
| Vanilla yield kg/ha: Land-use history      | -0.013          | 0.012             | 25.784    | -1.043         | 0.307            |
| <b>2) Mean normalized endemic richness</b> | <b>Estimate</b> | <b>Std. Error</b> | <b>df</b> | <b>t-value</b> | <b>p-value</b>   |
| Intercept                                  | 0.059           | 0.006             | 12.214    | 9.098          | <0.001           |
| Vanilla yield kg/ha                        | -0.001          | 0.005             | 25.609    | -0.201         | 0.842            |
| Land-use history (VFOR)                    | 0.061           | 0.010             | 25.783    | 6.183          | <b>&lt;0.001</b> |
| Vanilla yield kg/ha : Land-use history     | -0.012          | 0.013             | 24.318    | -0.931         | 0.361            |

16

17 **Supplementary Table 2:** General linear mixed effect models (glmmTMB) analyzing the effect of  
 18 vanilla yield kg/ha (scaled & sqrt transformed) in interaction with land-use history on species richness  
 19 across taxa: (endemic) trees (n=28), (endemic) herbaceous plants (n=30), (endemic) birds (n=30),  
 20 (endemic) amphibians (n=30), (endemic) reptiles (n=30), (endemic) butterflies (n=30) and (endemic)  
 21 ants (n=30). The p-values are based on two-sided t-tests testing whether the mean is different from  
 22 0. Significant effects are highlighted in bold. Digits were rounded to the third decimal place. Data  
 23 used from 30 vanilla agroforests (20 fallow-derived vanilla agroforests, 10 forest-derived vanilla  
 24 agroforests).  
 25

|                                        | <b>Estimate</b> | <b>Std. Error</b> | <b>z-value</b> | <b>p-value</b>   |
|----------------------------------------|-----------------|-------------------|----------------|------------------|
| <b>Tree richness</b>                   |                 |                   |                |                  |
| Intercept                              | 2.482           | 0.126             | 19.752         | <0.001           |
| Vanilla yield kg/ha                    | -0.051          | 0.075             | -0.677         | 0.498            |
| Land-use history (VFOR)                | 0.921           | 0.112             | 8.199          | <b>&lt;0.001</b> |
| Vanilla yield kg/ha : Land-use history | -0.144          | 0.118             | -1.219         | 0.223            |
| <b>Herbs richness</b>                  |                 |                   |                |                  |
| Intercept                              | 2.988           | 0.124             | 24.022         | <0.001           |
| Vanilla yield kg/ha                    | -0.077          | 0.076             | -1.003         | 0.316            |
| Land-use history (VFOR)                | 0.008           | 0.151             | 0.052          | 0.959            |
| Vanilla yield kg/ha : Land-use history | 0.083           | 0.201             | 0.410          | 0.682            |
| <b>Bird richness</b>                   |                 |                   |                |                  |
| Intercept                              | 1.843           | 0.064             | 28.875         | <0.001           |
| Vanilla yield kg/ha                    | -0.032          | 0.057             | -0.560         | 0.575            |
| Land-use history (VFOR)                | 0.188           | 0.098             | 1.911          | 0.056            |
| Vanilla yield kg/ha : Land-use history | -0.037          | 0.129             | -0.287         | 0.774            |
| <b>Amphibians richness</b>             |                 |                   |                |                  |
| Intercept                              | 1.514           | 0.062             | 24.448         | < 0.001          |
| Vanilla yield kg/ha                    | 0.110           | 0.055             | 2.001          | <b>0.045</b>     |
| Land-use history (VFOR)                | 0.013           | 0.108             | 0.122          | 0.903            |
| Vanilla yield kg/ha : Land-use history | -0.120          | 0.142             | -0.840         | 0.401            |
| <b>Reptile richness</b>                |                 |                   |                |                  |
| Intercept                              | 1.908           | 0.090             | 21.280         | <0.001           |
| Vanilla yield kg/ha                    | -0.125          | 0.082             | -1.512         | 0.131            |
| Land-use history (VFOR)                | 0.303           | 0.142             | 2.140          | <b>0.032</b>     |
| Vanilla yield kg/ha : Land-use history | 0.282           | 0.175             | 1.615          | 0.106            |
| <b>Butterflies richness</b>            |                 |                   |                |                  |
| Intercept                              | 2.329           | 0.085             | 27.258         | < 0.001          |
| Vanilla yield kg/ha                    | -0.179          | 0.071             | -2.525         | <b>0.012</b>     |
| Land-use history (VFOR)                | 0.073           | 0.196             | 0.372          | 0.710            |
| Vanilla yield kg/ha : Land-use history | 0.220           | 0.202             | 1.088          | 0.277            |
| <b>Ants richness</b>                   |                 |                   |                |                  |
| Intercept                              | 2.737           | 0.063             | 43.390         | < 0.001          |
| Vanilla yield kg/ha                    | 0.010           | 0.057             | 0.180          | 0.858            |
| Land-use history (VFOR)                | 0.177           | 0.099             | 1.790          | 0.073            |
| Vanilla yield kg/ha : Land-use history | -0.093          | 0.131             | -0.710         | 0.478            |
| <b>Endemic Tree richness</b>           |                 |                   |                |                  |
| Intercept                              | 0.607           | 0.359             | 1.692          | 0.091            |

|                                          |        |       |        |                   |
|------------------------------------------|--------|-------|--------|-------------------|
| Vanilla yield kg/ha                      | 0.224  | 0.188 | 1.191  | 0.234             |
| Land-use history (VFOR)                  | 2.141  | 0.236 | 9.074  | <b>&lt; 0.001</b> |
| Vanilla yield kg/ha : Land-use history   | -0.366 | 0.214 | -1.712 | 0.087             |
| <b>Endemic Herbaceous plant richness</b> |        |       |        |                   |
| Intercept                                | 0.895  | 0.106 | 8.414  | <0.001            |
| Vanilla yield kg/ha                      | 0.107  | 0.095 | 1.123  | 0.261             |
| Land-use history (VFOR)                  | 0.456  | 0.160 | 2.858  | <b>0.004</b>      |
| Vanilla yield kg/ha : Land-use history   | -0.033 | 0.198 | -0.168 | 0.867             |
| <b>Endemic Birds richness</b>            |        |       |        |                   |
| Intercept                                | -0.232 | 0.261 | -0.892 | 0.373             |
| Vanilla yield kg/ha                      | -0.300 | 0.240 | -1.254 | 0.210             |
| Land-use history (VFOR)                  | 1.078  | 0.334 | 3.227  | <b>0.001</b>      |
| Vanilla yield kg/ha : Land-use history   | 0.145  | 0.402 | 0.361  | 0.718             |
| <b>Endemic Amphibian richness</b>        |        |       |        |                   |
| Intercept                                | 1.328  | 0.116 | 11.476 | <0.001            |
| Vanilla yield kg/ha                      | 0.164  | 0.101 | 1.623  | 0.105             |
| Land-use history (VFOR)                  | 0.063  | 0.197 | 0.318  | 0.750             |
| Vanilla yield kg/ha : Land-use history   | -0.204 | 0.260 | -0.783 | 0.434             |
| <b>Endemic Reptile richness</b>          |        |       |        |                   |
| Intercept                                | 1.628  | 0.094 | 17.254 | < 0.001           |
| Vanilla yield kg/ha                      | -0.145 | 0.060 | -2.401 | <b>0.016</b>      |
| Land-use history (VFOR)                  | 0.074  | 0.118 | 0.626  | 0.531             |
| Vanilla yield kg/ha : Land-use history   | 0.289  | 0.132 | 2.197  | <b>0.028</b>      |
| <b>Endemic Butterflies richness</b>      |        |       |        |                   |
| Intercept                                | 1.852  | 0.056 | 33.060 | < 0.001           |
| Vanilla yield kg/ha                      | -0.104 | 0.051 | -2.020 | <b>0.043</b>      |
| Land-use history (VFOR)                  | 0.072  | 0.095 | 0.760  | 0.447             |
| Vanilla yield kg/ha : Land-use history   | 0.038  | 0.126 | 0.300  | 0.763             |
| <b>Endemic Ants richness</b>             |        |       |        |                   |
| Intercept                                | 1.161  | 0.154 | 7.560  | <0.001            |
| Vanilla yield kg/ha                      | 0.116  | 0.128 | 0.910  | 0.363             |
| Land-use history (VFOR)                  | 0.717  | 0.195 | 3.680  | <b>&lt;0.001</b>  |
| Vanilla yield kg/ha : Land-use history   | -0.063 | 0.238 | -0.265 | 0.791             |

27 **Supplementary Table 3:** Mean values of (endemic) mean normalized richness and (endemic) species  
 28 richness of seven taxa in forest-derived vanilla agroforest (**VFOR**) and old-growth forest (**FOR**) with  
 29 absolute difference (mean richness VFOR- mean richness FOR) and relative percentage difference  
 30 (=mean richness VFOR\*100/mean richness FOR) and relative percentage gain or loss from old-growth  
 31 forest to forest-derived vanilla agroforest (=absolute difference\*100/mean richness FOR). Relative  
 32 percentage loss is highlighted in yellow.  
 33

| Land-use type                    | FOR   | VFOR  | Absolute difference FOR-VFOR | Relative difference % VFOR-FOR | Relative Gain/Loss in % |
|----------------------------------|-------|-------|------------------------------|--------------------------------|-------------------------|
| Mean normalized richness         | 0.23  | 0.18  | -0.052                       | 77                             | -23                     |
| Mean normalized endemic richness | 0.22  | 0.12  | -0.105                       | 53                             | -47                     |
| Birds                            | 12.30 | 7.60  | -4.700                       | 62                             | -38                     |
| Endemic Birds                    | 7.40  | 2.30  | -5.100                       | 31                             | -69                     |
| Herbs                            | 15.50 | 20.60 | 5.100                        | 133                            | 33                      |
| Endemic herbs                    | 5.50  | 3.90  | -1.600                       | 71                             | -29                     |
| Amphibians                       | 9.30  | 4.60  | -4.700                       | 49                             | -51                     |
| Endemic amphibians               | 9.30  | 4.00  | -5.300                       | 43                             | -57                     |
| Reptiles                         | 9.80  | 9.40  | -0.400                       | 96                             | -4                      |
| Endemic reptiles                 | 8.50  | 5.90  | -2.600                       | 69                             | -31                     |
| Butterflies                      | 6.20  | 11.30 | 5.100                        | 182                            | 82                      |
| Endemic butterflies              | 6.10  | 6.80  | 0.700                        | 111                            | 11                      |
| Ants                             | 16.40 | 18.40 | 2.000                        | 112                            | 12                      |
| Endemic ants                     | 9.60  | 6.90  | -2.700                       | 72                             | -28                     |
| Tree                             | 64.40 | 31.30 | -33.100                      | 49                             | -51                     |
| Endemic trees                    | 47.30 | 19.90 | -27.400                      | 42                             | -58                     |

34

35 **Supplementary Table 4:** Tukey multiple comparison test of means for all land-use-pairs of **mean**  
 36 **normalized richness** (including 7 taxa: tree, herbaceous plant, birds, reptiles, amphibians, butterflies  
 37 and ants). Pairwise comparisons calculated with the glht-function of the package 'multcomp' with all  
 38 terms significant at <0.05 (highlighted in bold). The test compares the difference between each pair  
 39 of means with bonferroni adjustment. Linear-mixed effect models (LMM) were used. FOR=Old-  
 40 growth forest; FFOR= Forest fragment; VFOR=Forest-derived vanilla agroforest; VFAL=Fallow-derived  
 41 vanilla agroforest; FAL=Fallow.

42

| <b>Mean normalized richness</b> | <b>Estimate</b> | <b>Std. Error</b> | <b>z-value</b> | <b>p-value</b>   |
|---------------------------------|-----------------|-------------------|----------------|------------------|
| FFOR-FOR                        | -0.062          | 0.012             | -5.202         | <b>&lt;0.001</b> |
| VFOR-FOR                        | -0.052          | 0.012             | -4.360         | <b>&lt;0.001</b> |
| FAL-FOR                         | -0.111          | 0.010             | -10.579        | <b>&lt;0.001</b> |
| VFAL-FOR                        | -0.096          | 0.010             | -9.207         | <b>&lt;0.001</b> |
| VFOR-FFOR                       | 0.010           | 0.012             | 0.846          | 0.915            |
| FAL-FFOR                        | -0.048          | 0.010             | -4.733         | <b>&lt;0.001</b> |
| VFAL-FFOR                       | -0.034          | 0.010             | -3.329         | <b>0.008</b>     |
| FAL-VFOR                        | -0.058          | 0.010             | -5.693         | <b>&lt;0.001</b> |
| VFAL-VFOR                       | -0.044          | 0.010             | -4.278         | <b>&lt;0.001</b> |
| VFAL-FAL                        | 0.014           | 0.008             | 1.714          | 0.421            |

43

44 **Supplementary Table 5:** Test results of Kruskal-Wallis test and pairwise Wilcoxon-test for all land-  
 45 use-pairs of **mean normalized endemic richness** (including 7 taxa: tree, herbaceous plant, birds,  
 46 reptiles, amphibians, butterflies and ants) and (endemic) tree richness. Non-parametric Kruskal-  
 47 Wallis test, followed by pairwise Wilcoxon test was used to account for heteroscedastic residuals for  
 48 these taxa. FOR=Old-growth forest; FFOR= Forest fragment; VFOR=Forest-derived vanilla agroforest;  
 49 VFAL=Fallow-derived vanilla agroforest; FAL=Fallow. Significant terms at <0.05 are highlighted in  
 50 bold.  
 51  
 52

| <b>Mean normalized endemic richness</b> |                                                   |                  |                  |              |
|-----------------------------------------|---------------------------------------------------|------------------|------------------|--------------|
| Kruskal-Wallis                          | $\chi^2=54.363$ ; Df=4; p-value= <b>&lt;0.001</b> |                  |                  |              |
|                                         | FOR                                               | FFOR             | VFOR             | FAL          |
| FFOR                                    | <b>0.005</b>                                      | -                | -                | -            |
| VFOR                                    | <b>0.002</b>                                      | 1.000            | -                | -            |
| FAL                                     | <b>&lt;0.001</b>                                  | <b>&lt;0.001</b> | <b>0.001</b>     | -            |
| VFAL                                    | <b>&lt;0.001</b>                                  | <b>0.001</b>     | <b>0.002</b>     | <b>0.002</b> |
|                                         |                                                   |                  |                  |              |
| <b>Tree richness</b>                    |                                                   |                  |                  |              |
| Kruskal-Wallis                          | $\chi^2=52.42$ ; Df=4; p-value= <b>&lt;0.001</b>  |                  |                  |              |
|                                         | FOR                                               | FFOR             | VFOR             | FAL          |
| FFOR                                    | 0.100                                             | -                | -                | -            |
| VFOR                                    | <b>0.015</b>                                      | 1.000            | -                | -            |
| FAL                                     | <b>&lt;0.001</b>                                  | <b>&lt;0.001</b> | <b>&lt;0.001</b> | -            |
| VFAL                                    | <b>&lt;0.001</b>                                  | <b>&lt;0.001</b> | <b>0.014</b>     | <b>0.003</b> |
|                                         |                                                   |                  |                  |              |
| <b>Endemic tree richness</b>            |                                                   |                  |                  |              |
| Kruskal-Wallis                          | $\chi^2=48.612$ ; Df=4; p-value= <b>&lt;0.001</b> |                  |                  |              |
|                                         | FOR                                               | FFOR             | VFOR             | FAL          |
| FFOR                                    | 0.090                                             | -                | -                | -            |
| VFOR                                    | <b>0.015</b>                                      | 1.000            | -                | -            |
| FAL                                     | <b>&lt;0.001</b>                                  | <b>&lt;0.001</b> | <b>0.002</b>     | -            |
| VFAL                                    | <b>&lt;0.001</b>                                  | <b>&lt;0.001</b> | <b>0.006</b>     | 0.690        |

53



54 **Supplementary Table 6:** Tukey multiple comparison test of means for all land-use-pairs showing  
55 dissimilarities among land-use systems of (endemic) tree, (endemic) herbaceous plant, (endemic)  
56 bird, (endemic) amphibian, (endemic) reptile, (endemic) butterfly and (endemic) ant richness. The  
57 test compares the difference between each pair of means with bonferroni adjustment. Pairwise  
58 comparisons calculated with the glht-function of the package 'multcomp' including Bonferroni  
59 correction with all terms significant at <0.05 (highlighted in bold). FOR=Old-growth forest; FFOR=  
60 Forest fragment; VFOR=Forest-derived vanilla agroforest; VFAL=Fallow-derived vanilla agroforest;  
61 FAL=Fallow.  
62

| <b>Herbaceous plant richness</b>         | <b>Estimate</b> | <b>Std. Error</b> | <b>z-value</b> | <b>p-value</b>   |
|------------------------------------------|-----------------|-------------------|----------------|------------------|
| FFOR-FOR                                 | -0.099          | 0.208             | -0.477         | 0.989            |
| VFOR-FOR                                 | 0.285           | 0.204             | 1.397          | 0.623            |
| FAL-FOR                                  | 0.517           | 0.180             | 2.867          | <b>0.032</b>     |
| VFAL-FOR                                 | 0.292           | 0.182             | 1.604          | 0.488            |
| VFOR-FFOR                                | 0.385           | 0.189             | 2.030          | 0.246            |
| FAL-FFOR                                 | 0.616           | 0.163             | 3.770          | <b>0.001</b>     |
| VFAL-FFOR                                | 0.392           | 0.165             | 2.381          | 0.117            |
| FAL-VFOR                                 | 0.232           | 0.157             | 1.472          | 0.574            |
| VFAL-VFOR                                | 0.007           | 0.162             | 0.045          | 1.000            |
| VFAL-FAL                                 | -0.224          | 0.129             | -1.737         | 0.404            |
| <b>Endemic herbaceous plant richness</b> | <b>Estimate</b> | <b>Std. Error</b> | <b>z-value</b> | <b>p-value</b>   |
| FFOR-FOR                                 | -0.223          | 0.202             | -1.103         | 0.805            |
| VFOR-FOR                                 | -0.344          | 0.209             | -1.642         | 0.470            |
| FAL-FOR                                  | -0.894          | 0.201             | -4.447         | <b>&lt;0.001</b> |
| VFAL-FOR                                 | -0.809          | 0.196             | -4.117         | <b>&lt;0.001</b> |
| VFOR-FFOR                                | -0.121          | 0.220             | -0.548         | 0.982            |
| FAL-FFOR                                 | -0.671          | 0.212             | -3.163         | <b>0.013</b>     |
| VFAL-FFOR                                | -0.586          | 0.208             | -2.819         | <b>0.039</b>     |
| FAL-VFOR                                 | -0.550          | 0.219             | -2.514         | 0.087            |
| VFAL-VFOR                                | -0.465          | 0.215             | -2.166         | 0.192            |
| VFAL-FAL                                 | 0.085           | 0.206             | 0.412          | 0.994            |
| <b>Bird richness</b>                     | <b>Estimate</b> | <b>Std. Error</b> | <b>z-value</b> | <b>p-value</b>   |
| FFOR-FOR                                 | -0.578          | 0.150             | -3.843         | <b>0.001</b>     |
| VFOR-FOR                                 | -0.481          | 0.146             | -3.300         | <b>0.009</b>     |
| FAL-FOR                                  | -0.669          | 0.127             | -5.278         | <b>&lt;0.001</b> |
| VFAL-FOR                                 | -0.661          | 0.127             | -5.226         | <b>&lt;0.001</b> |
| VFOR-FFOR                                | 0.097           | 0.166             | 0.581          | 0.978            |
| FAL-FFOR                                 | -0.091          | 0.150             | -0.607         | 0.974            |
| VFAL-FFOR                                | -0.083          | 0.150             | -0.555         | 0.981            |
| FAL-VFOR                                 | -0.188          | 0.145             | -1.292         | 0.694            |
| VFAL-VFOR                                | -0.180          | 0.145             | -1.239         | 0.726            |
| VFAL-FAL                                 | 0.008           | 0.126             | 0.063          | 1.000            |
| <b>Endemic bird richness</b>             | <b>Estimate</b> | <b>Std. Error</b> | <b>z-value</b> | <b>p-value</b>   |
| FFOR-FOR                                 | -1.307          | 0.269             | -4.858         | <b>&lt;0.001</b> |
| VFOR-FOR                                 | -1.168          | 0.259             | -4.514         | <b>&lt;0.001</b> |
| FAL-FOR                                  | -2.106          | 0.279             | -7.542         | <b>&lt;0.001</b> |

|                                   |                 |                   |                |                  |
|-----------------------------------|-----------------|-------------------|----------------|------------------|
| VFAL-FOR                          | -2.162          | 0.285             | -7.576         | <b>&lt;0.001</b> |
| VFOR-FFOR                         | 0.139           | 0.307             | 0.453          | 0.991            |
| FAL-FFOR                          | -0.799          | 0.325             | -2.458         | 0.099            |
| VFAL-FFOR                         | -0.855          | 0.330             | -2.590         | 0.071            |
| FAL-VFOR                          | -0.938          | 0.316             | -2.965         | <b>0.025</b>     |
| VFAL-VFOR                         | -0.995          | 0.324             | -3.075         | <b>0.018</b>     |
| VFAL-FAL                          | -0.057          | 0.339             | -0.168         | 1.000            |
| <b>Amphibian richness</b>         | <b>Estimate</b> | <b>Std. Error</b> | <b>z-value</b> | <b>p-value</b>   |
| FFOR-FOR                          | -0.601          | 0.134             | -4.494         | <b>&lt;0.001</b> |
| VFOR-FOR                          | -0.704          | 0.139             | -5.080         | <b>&lt;0.001</b> |
| FAL-FOR                           | -0.977          | 0.122             | -8.005         | <b>&lt;0.001</b> |
| VFAL-FOR                          | -0.715          | 0.113             | -6.319         | <b>&lt;0.001</b> |
| VFOR-FFOR                         | -0.103          | 0.157             | -0.658         | 0.965            |
| FAL-FFOR                          | -0.376          | 0.142             | -2.644         | 0.062            |
| VFAL-FFOR                         | -0.114          | 0.135             | -0.846         | 0.915            |
| FAL-VFOR                          | -0.273          | 0.147             | -1.859         | 0.337            |
| VFAL-VFOR                         | -0.011          | 0.140             | -0.078         | 1.000            |
| VFAL-FAL                          | 0.262           | 0.123             | 2.128          | 0.206            |
| <b>Endemic amphibian richness</b> | <b>Estimate</b> | <b>Std. Error</b> | <b>z-value</b> | <b>p-value</b>   |
| FFOR-FOR                          | -0.601          | 0.133             | -4.531         | <b>&lt;0.001</b> |
| VFOR-FOR                          | -0.844          | 0.145             | -5.834         | <b>&lt;0.001</b> |
| FAL-FOR                           | -1.200          | 0.130             | -9.209         | <b>&lt;0.001</b> |
| VFAL-FOR                          | -0.895          | 0.118             | -7.580         | <b>&lt;0.001</b> |
| VFOR-FFOR                         | -0.243          | 0.162             | -1.501         | 0.558            |
| FAL-FFOR                          | -0.600          | 0.149             | -4.017         | <b>&lt;0.001</b> |
| VFAL-FFOR                         | -0.294          | 0.139             | -2.121         | 0.208            |
| FAL-VFOR                          | -0.357          | 0.160             | -2.228         | 0.167            |
| VFAL-VFOR                         | -0.051          | 0.150             | -0.341         | 0.997            |
| VFAL-FAL                          | 0.305           | 0.137             | 2.236          | 0.164            |
| <b>Reptile richness</b>           | <b>Estimate</b> | <b>Std. Error</b> | <b>z-value</b> | <b>p-value</b>   |
| FFOR-FOR                          | -0.022          | 0.162             | -0.138         | 1.000            |
| VFOR-FOR                          | -0.052          | 0.165             | -0.317         | 0.998            |
| FAL-FOR                           | -0.685          | 0.161             | -4.242         | <b>&lt;0.001</b> |
| VFAL-FOR                          | -0.355          | 0.153             | -2.324         | 0.136            |
| VFOR-FFOR                         | -0.030          | 0.147             | -0.203         | 1.000            |
| FAL-FFOR                          | -0.662          | 0.143             | -4.624         | <b>&lt;0.001</b> |
| VFAL-FFOR                         | -0.333          | 0.134             | -2.490         | 0.092            |
| FAL-VFOR                          | -0.632          | 0.146             | -4.321         | <b>&lt;0.001</b> |
| VFAL-VFOR                         | -0.303          | 0.140             | -2.171         | 0.189            |
| VFAL-FAL                          | 0.329           | 0.133             | 2.484          | 0.093            |
| <b>Endemic reptile richness</b>   | <b>Estimate</b> | <b>Std. Error</b> | <b>z-value</b> | <b>p-value</b>   |
| FFOR-FOR                          | -0.149          | 0.168             | -0.883         | 0.901            |
| VFOR-FOR                          | -0.370          | 0.176             | -2.096         | 0.215            |
| FAL-FOR                           | -0.815          | 0.169             | -4.837         | <b>&lt;0.001</b> |
| VFAL-FOR                          | -0.494          | 0.163             | -3.029         | <b>0.020</b>     |
| VFOR-FFOR                         | -0.221          | 0.129             | -1.717         | 0.415            |
| FAL-FFOR                          | -0.667          | 0.118             | -5.669         | <b>&lt;0.001</b> |

|                                   |                 |                   |                |                  |
|-----------------------------------|-----------------|-------------------|----------------|------------------|
| VFAL-FFOR                         | -0.346          | 0.110             | -3.150         | <b>0.014</b>     |
| FAL-VFOR                          | -0.446          | 0.129             | -3.457         | <b>0.0048</b>    |
| VFAL-VFOR                         | -0.125          | 0.126             | -0.993         | 0.855            |
| VFAL-FAL                          | 0.321           | 0.110             | 2.916          | <b>0.028</b>     |
| <b>Butterfly richness</b>         | <b>Estimate</b> | <b>Std. Error</b> | <b>z-value</b> | <b>p-value</b>   |
| FFOR-FOR                          | -0.198          | 0.212             | -0.933         | 0.878            |
| VFOR-FOR                          | 0.551           | 0.190             | 2.905          | <b>0.028</b>     |
| FAL-FOR                           | 0.470           | 0.175             | 2.691          | 0.052            |
| VFAL-FOR                          | 0.548           | 0.175             | 3.135          | <b>0.014</b>     |
| VFOR-FFOR                         | 0.749           | 0.173             | 4.335          | <b>&lt;0.001</b> |
| FAL-FFOR                          | 0.668           | 0.157             | 4.258          | <b>&lt;0.001</b> |
| VFAL-FFOR                         | 0.746           | 0.157             | 4.741          | <b>&lt;0.001</b> |
| FAL-VFOR                          | -0.081          | 0.124             | -0.654         | 0.964            |
| VFAL-VFOR                         | -0.003          | 0.130             | -0.022         | 1.000            |
| VFAL-FAL                          | 0.078           | 0.101             | 0.771          | 0.935            |
| <b>Endemic butterfly richness</b> | <b>Estimate</b> | <b>Std. Error</b> | <b>z-value</b> | <b>p-value</b>   |
| FFOR-FOR                          | -0.327          | 0.170             | -1.922         | 0.300            |
| VFOR-FOR                          | 0.109           | 0.151             | 0.720          | 0.951            |
| FAL-FOR                           | -0.179          | 0.139             | -1.290         | 0.693            |
| VFAL-FOR                          | 0.056           | 0.133             | 0.419          | 0.993            |
| VFOR-FFOR                         | 0.435           | 0.166             | 2.620          | 0.065            |
| FAL-FFOR                          | 0.148           | 0.155             | 0.951          | 0.874            |
| VFAL-FFOR                         | 0.382           | 0.150             | 2.548          | 0.078            |
| FAL-VFOR                          | -0.288          | 0.134             | -2.145         | 0.198            |
| VFAL-VFOR                         | -0.053          | 0.128             | -0.412         | 0.994            |
| VFAL-FAL                          | 0.235           | 0.114             | 2.067          | 0.230            |
| <b>Ant richness</b>               | <b>Estimate</b> | <b>Std. Error</b> | <b>z-value</b> | <b>p-value</b>   |
| FFOR-FOR                          | -0.070          | 0.121             | -0.576         | 0.978            |
| VFOR-FOR                          | 0.117           | 0.117             | 0.999          | 0.854            |
| FAL-FOR                           | -0.214          | 0.109             | -1.960         | 0.282            |
| VFAL-FOR                          | -0.061          | 0.107             | -0.572         | 0.979            |
| VFOR-FFOR                         | 0.187           | 0.110             | 1.691          | 0.435            |
| FAL-FFOR                          | -0.144          | 0.102             | -1.417         | 0.613            |
| VFAL-FFOR                         | 0.009           | 0.099             | 0.087          | 1.000            |
| FAL-VFOR                          | -0.331          | 0.097             | -3.405         | <b>0.006</b>     |
| VFAL-VFOR                         | -0.178          | 0.096             | -1.861         | 0.335            |
| VFAL-FAL                          | 0.152           | 0.084             | 1.814          | 0.361            |
| <b>Endemic ant richness</b>       | <b>Estimate</b> | <b>Std. Error</b> | <b>z-value</b> | <b>p-value</b>   |
| FFOR-FOR                          | -0.375          | 0.179             | -2.095         | 0.218            |
| VFOR-FOR                          | -0.339          | 0.180             | -1.885         | 0.320            |
| FAL-FOR                           | -2.039          | 0.239             | -8.548         | <b>&lt;0.001</b> |
| VFAL-FOR                          | -1.064          | 0.180             | -5.924         | <b>&lt;0.001</b> |
| VFOR-FFOR                         | 0.036           | 0.175             | 0.206          | 1.000            |
| FAL-FFOR                          | -1.664          | 0.235             | -7.085         | <b>&lt;0.001</b> |
| VFAL-FFOR                         | -0.689          | 0.175             | -3.942         | <b>0.001</b>     |
| FAL-VFOR                          | -1.700          | 0.235             | -7.223         | <b>&lt;0.001</b> |
| VFAL-VFOR                         | -0.725          | 0.178             | -4.073         | <b>&lt;0.001</b> |

|          |       |       |       |        |
|----------|-------|-------|-------|--------|
| VFAL-FAL | 0.975 | 0.235 | 4.143 | <0.001 |
|----------|-------|-------|-------|--------|

63

64 **Supplementary Table 7:** Table of alpha diversity (mean species richness across all plot of each land-  
65 use type) and gamma diversity (sum of species richness of all plots of each land-use type). For  
66 gamma diversity: 10 plots of each land-use type were randomly selected (Note: 5 plots of herbaceous  
67 fallow and 5 plots of woody fallow = 10 fallow plots).

|                                               | FOR    | FFOR   | VFOR   | FLW    | VFAL  |
|-----------------------------------------------|--------|--------|--------|--------|-------|
| <b>Mean normalized alpha richness</b>         | 0.23   | 0.17   | 0.18   | 0.12   | 0.13  |
| <b>Mean normalized alpha endemic richness</b> | 0.22   | 0.14   | 0.12   | 0.05   | 0.06  |
| <b>Alpha Tree richness</b>                    | 64.40  | 41.10  | 31.30  | 10.20  | 12.72 |
| <b>Gamma Tree richness</b>                    | 257.00 | 230.00 | 198.00 | 51.00  | 69.00 |
| <b>Alpha Endemic Tree richness</b>            | 47.30  | 27.70  | 19.90  | 3.60   | 2.50  |
| <b>Gamma Endemic Tree richness</b>            | 180.00 | 152.00 | 125.00 | 21.00  | 21.00 |
| <b>Alpha Herb richness</b>                    | 15.50  | 14.10  | 20.60  | 25.80  | 21.05 |
| <b>Gamma Herb richness</b>                    | 77.00  | 75.00  | 92.00  | 108.00 | 92.00 |
| <b>Alpha Endemic Herb richness</b>            | 5.50   | 4.40   | 3.90   | 2.25   | 2.45  |
| <b>Gamma Endemic Herb richness</b>            | 24.00  | 27.00  | 19.00  | 10.00  | 12.00 |
| <b>Alpha Bird richness</b>                    | 12.30  | 6.90   | 7.60   | 6.30   | 6.35  |
| <b>Gamma Bird richness</b>                    | 34.00  | 23.00  | 25.00  | 18.00  | 18.00 |
| <b>Alpha Endemic Bird richness</b>            | 7.40   | 2.00   | 2.30   | 1.00   | 0.85  |
| <b>Gamma Endemic Bird richness</b>            | 24.00  | 10.00  | 13.00  | 6.00   | 7.00  |
| <b>Alpha Amphibian richness</b>               | 9.30   | 5.10   | 4.60   | 3.50   | 4.55  |
| <b>Gamma Amphibian richness</b>               | 32.00  | 26.00  | 14.00  | 6.00   | 12.00 |
| <b>Alpha Endemic Amphibian richness</b>       | 9.30   | 5.10   | 4.00   | 2.80   | 3.80  |
| <b>Gamma Endemic Amphibian richness</b>       | 32.00  | 26.00  | 13.00  | 5.00   | 11.00 |
| <b>Alpha Reptile richness</b>                 | 19.10  | 14.70  | 14.00  | 8.45   | 11.40 |
| <b>Gamma Reptile richness</b>                 | 66.00  | 56.00  | 44.00  | 23.00  | 34.00 |
| <b>Alpha Endemic Reptile richness</b>         | 9.30   | 5.10   | 4.00   | 2.80   | 3.80  |
| <b>Gamma Endemic Reptile richness</b>         | 32.00  | 26.00  | 13.00  | 5.00   | 11.00 |
| <b>Alpha Butterfly richness</b>               | 6.20   | 5.10   | 11.30  | 9.95   | 10.50 |
| <b>Gamma Butterfly richness</b>               | 20.00  | 19.00  | 44.00  | 39.00  | 35.00 |
| <b>Alpha Endemic Butterfly richness</b>       | 6.10   | 4.40   | 6.80   | 5.10   | 6.45  |
| <b>Gamma Endemic Butterfly richness</b>       | 19.00  | 14.00  | 24.00  | 19.00  | 21.00 |
| <b>Alpha Ant richness</b>                     | 16.40  | 15.30  | 18.40  | 13.25  | 15.45 |
| <b>Gamma Ant richness</b>                     | 55.00  | 58.00  | 71.00  | 47.00  | 54.00 |
| <b>Alpha Endemic Ant richness</b>             | 9.60   | 6.60   | 6.90   | 2.27   | 3.67  |
| <b>Gamma Endemic Ant richness</b>             | 32.00  | 28.00  | 32.00  | 10.00  | 20.00 |

68

69 **Supplementary Table 8:** Mean values of (endemic) mean normalized richness and (endemic) species  
70 richness of seven taxa in forest-derived vanilla agroforest (**VFOR**) and forest fragment (**FFOR**) with  
71 absolute difference (mean richness VFOR- mean richness FFOR) and relative percentage difference  
72 (=mean richness VFOR\*100/mean richness FFOR) and relative percentage gain or loss from forest  
73 fragment to forest-derived vanilla agroforest (=absolute difference\*100/mean richness FFOR).  
74 Relative percentage loss is highlighted in yellow  
75

| Land-use type                    | FFOR  | VFOR  | Absolute difference<br>FFOR-VFOR | Relative difference<br>% VFOR-<br>FFOR | Relative Gain/Loss in<br>% |
|----------------------------------|-------|-------|----------------------------------|----------------------------------------|----------------------------|
| Mean normalized richness         | 0.17  | 0.18  | 0.010                            | 106                                    | 6                          |
| Mean normalized endemic richness | 0.14  | 0.12  | -0.019                           | 86                                     | -14                        |
| Birds                            | 6.90  | 7.60  | 0.700                            | 110                                    | 10                         |
| Endemic Birds                    | 2.00  | 2.30  | 0.300                            | 115                                    | 15                         |
| Herbs                            | 14.10 | 20.60 | 6.500                            | 146                                    | 46                         |
| Endemic herbs                    | 4.40  | 3.90  | -0.500                           | 89                                     | -11                        |
| Amphibians                       | 5.10  | 4.60  | -0.500                           | 90                                     | -10                        |
| Endemic amphibians               | 5.10  | 4.00  | -1.100                           | 78                                     | -22                        |
| Reptiles                         | 9.60  | 9.40  | -0.200                           | 98                                     | -2                         |
| Endemic reptiles                 | 7.40  | 5.90  | -1.500                           | 80                                     | -20                        |
| Butterflies                      | 5.10  | 11.30 | 6.200                            | 222                                    | 122                        |
| Endemic butterflies              | 4.40  | 6.80  | 2.400                            | 155                                    | 55                         |
| Ants                             | 15.30 | 18.40 | 3.100                            | 120                                    | 20                         |
| Endemic ants                     | 6.60  | 6.90  | 0.300                            | 105                                    | 5                          |
| Tree                             | 41.10 | 31.30 | -9.800                           | 76                                     | -24                        |
| Endemic trees                    | 27.70 | 19.90 | -7.800                           | 72                                     | -28                        |

76

77 **Supplementary Table 9:** Mean values of (endemic) mean normalized richness and (endemic) species  
 78 richness of seven taxa in fallow-derived vanilla agroforest (**VFAL**) and fallows (**FAL**) with the absolute  
 79 difference (mean richness VFAL- mean richness FAL) and relative percentage difference (=mean  
 80 richness VFAL\*100/mean richness FAL) and relative percentage gain or loss from fallow to fallow-  
 81 derived vanilla agroforest (=absolute difference\*100/mean richness fallow). Relative percentage gain  
 82 is highlighted in blue  
 83  
 84

| Land-use type                    | FAL   | VFAL  | Absolute difference<br>FAL-VFAL | Relative difference<br>% VFAL-FAL | Relative Gain/Loss in % |
|----------------------------------|-------|-------|---------------------------------|-----------------------------------|-------------------------|
| Mean normalized richness         | 0.12  | 0.13  | 0.014                           | 112                               | 12                      |
| Mean normalized endemic richness | 0.04  | 0.06  | 0.016                           | 138                               | 38                      |
| Birds                            | 6.30  | 6.35  | 0.050                           | 101                               | 1                       |
| Endemic Birds                    | 0.90  | 0.85  | -0.050                          | 94                                | -6                      |
| Herbs                            | 25.80 | 21.05 | -4.750                          | 82                                | -18                     |
| Endemic herbs                    | 2.25  | 2.45  | 0.200                           | 109                               | 9                       |
| Amphibians                       | 3.50  | 4.55  | 1.050                           | 130                               | 30                      |
| Endemic amphibians               | 2.80  | 3.80  | 1.000                           | 136                               | 36                      |
| Reptiles                         | 4.95  | 6.85  | 1.900                           | 138                               | 38                      |
| Endemic reptiles                 | 3.80  | 5.25  | 1.450                           | 138                               | 38                      |
| Butterflies                      | 9.95  | 10.50 | 0.550                           | 106                               | 6                       |
| Endemic butterflies              | 5.10  | 6.45  | 1.350                           | 126                               | 26                      |
| Ants                             | 13.25 | 15.45 | 2.200                           | 117                               | 17                      |
| Endemic ants                     | 1.25  | 3.30  | 2.050                           | 264                               | 164                     |
| Tree                             | 5.10  | 12.72 | 7.622                           | 249                               | 149                     |
| Endemic trees                    | 1.80  | 2.50  | 0.700                           | 139                               | 39                      |

85

86 **Supplementary Table 10:** Sampling coverage (SC) depending on taxon for each land-use type  
 87 (FOR=Old-growth forest, FFOR= Forest fragment, VFOR=Forest-derived vanilla agroforest,  
 88 FAL=Fallow, VFAL=Fallow-derived vanilla agroforest. Sampling computed with *iNext* function, Hill-  
 89 number  $q=0$ , datatype=incidence raw, endpoint=20. Last row displays average values of sampling  
 90 coverage for each taxon.

|      | SC Birds | SC Butterflies | SC Trees | SC Ants | SC Herbs | SC Reptiles | SC Amphibians |
|------|----------|----------------|----------|---------|----------|-------------|---------------|
| FOR  | 0.91     | 0.86           | 0.80     | 0.86    | 0.73     | 0.89        | 0.85          |
| FFOR | 0.86     | 0.81           | 0.70     | 0.80    | 0.69     | 0.87        | 0.67          |
| VFOR | 0.85     | 0.86           | 0.62     | 0.80    | 0.79     | 0.89        | 0.88          |
| FAL  | 0.95     | 0.90           | 0.58     | 0.93    | 0.88     | 0.92        | 0.97          |
| VFAL | 0.95     | 0.91           | 0.87     | 0.92    | 0.86     | 0.91        | 0.89          |
| Mean | 0.90     | 0.87           | 0.71     | 0.86    | 0.79     | 0.90        | 0.85          |

91  
 92  
 93  
 94  
 95  
 96  
 97  
 98

**Supplementary Table 11:** Species composition multilevel pairwise comparisons of species richness of 7 taxa across land-use types (with False discovery rate correction) and results of multivariate dispersion test based on Jaccard dissimilarity matrix using the *betadisp* and the *permutest* function of the *vegan* package with false discovery rate. Significant p-values (<0.05) are highlighted with a star (\*).

| <b>Trees</b>  | F Model | R <sup>2</sup>  | p-value         | p-adjusted | sig     |           |
|---------------|---------|-----------------|-----------------|------------|---------|-----------|
| VFOR vs. FFOR | 0.778   | 0.041           | 0.970           | 0.970      |         |           |
| VFOR vs. VFAL | 2.265   | 0.080           | 0.001           | 0.001      | *       |           |
| VFOR vs. FAL  | 1.376   | 0.071           | 0.036           | 0.040      | *       |           |
| VFOR vs. FOR  | 2.275   | 0.112           | 0.001           | 0.001      | *       |           |
| FFOR vs. VFAL | 3.449   | 0.117           | 0.001           | 0.001      | *       |           |
| FFOR vs. FAL  | 2.077   | 0.103           | 0.001           | 0.001      | *       |           |
| FFOR vs. FOR  | 1.946   | 0.098           | 0.001           | 0.001      | *       |           |
| VFAL vs. FAL  | 1.601   | 0.058           | 0.010           | 0.013      | *       |           |
| VFAL vs. FOR  | 5.840   | 0.183           | 0.001           | 0.001      | *       |           |
| FAL vs. FOR   | 4.235   | 0.190           | 0.001           | 0.001      | *       |           |
|               | Df      | Sums of Squares | Mean of squares | F-Model    | R2      | Pr(>F)    |
| Groups        | 4.000   | 0.064           | 0.016           | 10.956     | 999.000 | 0.001 *** |
| Residuals     | 53.000  | 0.078           | 0.001           |            |         |           |
|               |         |                 |                 |            |         |           |
| <b>Herbs</b>  | F Model | R <sup>2</sup>  | p-value         | p-adjusted | sig     |           |
| VFOR vs. FFOR | 2.445   | 0.120           | 0.001           | 0.001      | *       |           |
| VFOR vs. VFAL | 1.783   | 0.060           | 0.006           | 0.006      | *       |           |
| VFOR vs. FAL  | 3.159   | 0.101           | 0.001           | 0.001      | *       |           |
| VFOR vs. FOR  | 3.617   | 0.167           | 0.001           | 0.001      | *       |           |
| FFOR vs. VFAL | 4.595   | 0.141           | 0.001           | 0.001      | *       |           |
| FFOR vs. FAL  | 4.549   | 0.140           | 0.001           | 0.001      | *       |           |
| FFOR vs. FOR  | 2.159   | 0.107           | 0.001           | 0.001      | *       |           |
| VFAL vs. FAL  | 2.953   | 0.072           | 0.001           | 0.001      | *       |           |
| VFAL vs. FOR  | 5.525   | 0.165           | 0.001           | 0.001      | *       |           |

|                   |         |                 |                 |            |         |        |
|-------------------|---------|-----------------|-----------------|------------|---------|--------|
| FAL vs. FOR       | 5.739   | 0.170           | 0.001           | 0.001      | *       |        |
|                   | Df      | Sums of Squares | Mean of squares | F-Model    | R2      | Pr(>F) |
| Groups            | 4.000   | 0.011           | 0.003           | 0.894      | 999.000 | 0.471  |
| Residuals         | 65.000  | 0.191           | 0.003           |            |         |        |
|                   |         |                 |                 |            |         |        |
| <b>Birds</b>      | F Model | R <sup>2</sup>  | p-value         | p-adjusted | sig     |        |
| VFOR vs. FFOR     | 0.403   | 0.022           | 0.974           | 0.974      |         |        |
| VFOR vs. VFAL     | 2.335   | 0.077           | 0.014           | 0.016      | *       |        |
| VFOR vs. FAL      | 2.695   | 0.088           | 0.003           | 0.004      | *       |        |
| VFOR vs. FOR      | 3.000   | 0.143           | 0.003           | 0.004      | *       |        |
| FFOR vs. VFAL     | 2.782   | 0.090           | 0.001           | 0.003      | *       |        |
| FFOR vs. FAL      | 2.918   | 0.094           | 0.004           | 0.005      | *       |        |
| FFOR vs. FOR      | 3.424   | 0.160           | 0.001           | 0.003      | *       |        |
| VFAL vs. FAL      | 2.798   | 0.069           | 0.002           | 0.004      | *       |        |
| VFAL vs. FOR      | 12.460  | 0.308           | 0.001           | 0.003      | *       |        |
| FAL vs. FOR       | 9.028   | 0.244           | 0.001           | 0.003      | *       |        |
|                   | Df      | Sums of Squares | Mean of squares | F-Model    | R2      | Pr(>F) |
| Groups            | 4.000   | 0.164           | 0.041           | 5.873      | 999.000 | 0.001  |
| Residuals         | 65.000  | 0.455           | 0.007           |            |         |        |
|                   |         |                 |                 |            |         |        |
| <b>Reptiles</b>   | F Model | R <sup>2</sup>  | p-value         | p-adjusted | sig     |        |
| VFOR vs. FFOR     | 1.836   | 0.093           | 0.017           | 0.017      | *       |        |
| VFOR vs. VFAL     | 2.685   | 0.088           | 0.004           | 0.004      | *       |        |
| VFOR vs. FAL      | 3.898   | 0.122           | 0.001           | 0.001      | *       |        |
| VFOR vs. FOR      | 5.880   | 0.246           | 0.001           | 0.001      | *       |        |
| FFOR vs. VFAL     | 4.665   | 0.143           | 0.001           | 0.001      | *       |        |
| FFOR vs. FAL      | 5.764   | 0.171           | 0.001           | 0.001      | *       |        |
| FFOR vs. FOR      | 3.842   | 0.176           | 0.001           | 0.001      | *       |        |
| VFAL vs. FAL      | 2.601   | 0.064           | 0.004           | 0.004      | *       |        |
| VFAL vs. FOR      | 12.627  | 0.311           | 0.001           | 0.001      | *       |        |
| FAL vs. FOR       | 12.127  | 0.302           | 0.001           | 0.001      | *       |        |
|                   | Df      | Sums of Squares | Mean of squares | F-Model    | R2      | Pr(>F) |
| Groups            | 4.000   | 0.034           | 0.008           | 0.928      | 999.000 | 0.481  |
| Residuals         | 65.000  | 0.589           | 0.009           |            |         |        |
|                   |         |                 |                 |            |         |        |
| <b>Amphibians</b> | F Model | R <sup>2</sup>  | p-value         | p-adjusted | sig     |        |
| VFOR vs. FFOR     | 2.286   | 0.113           | 0.011           | 0.016      | *       |        |
| VFOR vs. VFAL     | 1.371   | 0.047           | 0.195           | 0.217      |         |        |
| VFOR vs. FAL      | 1.532   | 0.054           | 0.162           | 0.203      |         |        |
| VFOR vs. FOR      | 9.031   | 0.334           | 0.001           | 0.002      | *       |        |
| FFOR vs. VFAL     | 8.079   | 0.224           | 0.001           | 0.002      | *       |        |
| FFOR vs. FAL      | 7.339   | 0.214           | 0.001           | 0.002      | *       |        |
| FFOR vs. FOR      | 6.626   | 0.269           | 0.001           | 0.002      | *       |        |
| VFAL vs. FAL      | 0.800   | 0.021           | 0.555           | 0.555      |         |        |



|                    |         |                 |                 |            |         |        |
|--------------------|---------|-----------------|-----------------|------------|---------|--------|
| VFAL vs. FOR       | 20.104  | 0.418           | 0.001           | 0.002      | *       |        |
| FAL vs. FOR        | 17.831  | 0.398           | 0.001           | 0.002      | *       |        |
|                    | Df      | Sums of Squares | Mean of squares | F-Model    | R2      | Pr(>F) |
| Groups             | 4.000   | 0.233           | 0.058           | 2.808      | 999.000 | 0.043  |
| Residuals          | 64.000  | 1.327           | 0.021           |            |         |        |
|                    |         |                 |                 |            |         |        |
| <b>Butterflies</b> | F Model | R <sup>2</sup>  | p-value         | p-adjusted | sig     |        |
| FOR vs. FFOR       | 5.881   | 0.246           | 0.001           | 0.002      | *       |        |
| FOR vs. FAL        | 8.916   | 0.242           | 0.001           | 0.002      | *       |        |
| FOR vs. VFOR       | 6.064   | 0.252           | 0.001           | 0.002      | *       |        |
| FOR vs. VFAL       | 10.334  | 0.270           | 0.001           | 0.002      | *       |        |
| FFOR vs. FAL       | 4.537   | 0.139           | 0.001           | 0.002      | *       |        |
| FFOR vs. VFOR      | 2.696   | 0.130           | 0.002           | 0.003      | *       |        |
| FFOR vs. VFAL      | 4.750   | 0.145           | 0.001           | 0.002      | *       |        |
| FAL vs. VFOR       | 1.702   | 0.057           | 0.012           | 0.013      | *       |        |
| FAL vs. VFAL       | 1.833   | 0.046           | 0.006           | 0.008      | *       |        |
| VFOR vs. VFAL      | 1.444   | 0.049           | 0.076           | 0.076      |         |        |
|                    | Df      | Sums of Squares | Mean of squares | F-Model    | R2      | Pr(>F) |
| Groups             | 4.000   | 0.112           | 0.028           | 4.937      | 999.000 | 0.002  |
| Residuals          | 65.000  | 0.369           | 0.006           |            |         |        |
|                    |         |                 |                 |            |         |        |
| <b>Ants</b>        | F Model | R <sup>2</sup>  | p-value         | p-adjusted | sig     |        |
| FOR vs. FFOR       | 2.753   | 0.133           | 0.001           | 0.001      | *       |        |
| FOR vs. FAL        | 9.892   | 0.261           | 0.001           | 0.001      | *       |        |
| FOR vs. VFOR       | 3.976   | 0.181           | 0.001           | 0.001      | *       |        |
| FOR vs. VFAL       | 7.005   | 0.200           | 0.001           | 0.001      | *       |        |
| FFOR vs. FAL       | 7.525   | 0.212           | 0.001           | 0.001      | *       |        |
| FFOR vs. VFOR      | 1.601   | 0.082           | 0.023           | 0.023      | *       |        |
| FFOR vs. VFAL      | 4.760   | 0.145           | 0.001           | 0.001      | *       |        |
| FAL vs. VFOR       | 5.429   | 0.162           | 0.001           | 0.001      | *       |        |
| FAL vs. VFAL       | 2.909   | 0.071           | 0.001           | 0.001      | *       |        |
| VFOR vs. VFAL      | 2.931   | 0.095           | 0.001           | 0.001      | *       |        |
|                    | Df      | Sums of Squares | Mean of squares | F-Model    | R2      | Pr(>F) |
| Groups             | 4.000   | 0.008           | 0.002           | 0.687      | 999.000 | 0.574  |
| Residuals          | 65.000  | 0.198           | 0.003           |            |         |        |

100 **Supplementary Table 12:** Overview of vanilla statistics for our 30 studied vanilla agroforests  
 101 depending on vanilla plant or vanilla agroforest

102

| Variable                                   | Mean    | SD      | Min     | Max      |
|--------------------------------------------|---------|---------|---------|----------|
| Vanilla age (yrs)/vanilla plant            | 4.42    | 3.14    | 1.28    | 13.4     |
| Vanilla yield (g)/vanilla plant            | 30.36   | 23.93   | 0       | 82.23    |
| Vanilla vine length (cm)/vanilla plant     | 694.06  | 707.80  | 0       | 5198     |
| Planting density (plants/ha)               | 3284.04 | 1443.72 | 1638.79 | 8519.751 |
|                                            |         |         |         |          |
| Agroforest age (yrs)                       | 10.8    | 14.05   | 3       | 50       |
| Green vanilla yield kg/ha (2018)           | 104.61  | 99.92   | 0       | 371.55   |
| Vine length (cm) (mean length /agroforest) | 695.30  | 274.63  | 219.89  | 1263.82  |
| Vanilla agroforest size (ha)               | 0.66    | 0.56    | 0.25    | 3.01     |

103

104 **Supplementary Table 13:** Determinants of vanilla yield in 30 vanilla agroforests. Model fits of linear  
 105 mixed effect model (LMM) of vanilla yield (sqrt-transformed) depending on environmental and  
 106 management variables with all terms significant at <0.05. Significant p-values highlighted in bold.  
 107 Chisq-values based on based on one-sided Chi-square tests of model comparison with *anova* function  
 108 =  $\chi^2$  of full model vs. full model excluding each predictor.

109

| Variables                       | Vanilla yield (kg/ha) |                  |
|---------------------------------|-----------------------|------------------|
|                                 | $\chi^2$              | p-value          |
| Canopy closure (%)              | 0.659                 | 0.417            |
| Soil characteristics (PC1)      | 3.069                 | 0.080            |
| Slope (°)                       | 0.527                 | 0.468            |
| Landscape forest cover (%)      | 0.587                 | 0.444            |
| Understory vegetation cover (%) | 0.030                 | 0.863            |
| Elevation (m)                   | 2.004                 | 0.157            |
| Planting density (no/ha)        | 17.993                | <b>&lt;0.001</b> |
| Pollination (hrs/ha)            | 6.645                 | <b>0.010</b>     |
| Vanilla vine length (cm)        | 18.511                | <b>&lt;0.001</b> |
| Vanilla plant age (yrs)         | 0.027                 | 0.869            |

110

111 **Supplementary Table 14:** Determinants of vanilla yield (kg/ha) in 30 vanilla agroforests (final model).  
 112 All predictor variables were scaled. Supplementary Table shows analysis of variance results (two-sided  
 113 t-tests use Satterthwaite's method) for final linear mixed model. Significant p-values (<0.05) are  
 114 highlighted in bold. Marginal R<sup>2</sup> is the variance explained by fixed effects while conditional R<sup>2</sup> is the  
 115 variance explained by fixed and marginal effects together.

116

| Response variable     | Parameter                         | Estimate | Df     | Std. Error | p-value          |
|-----------------------|-----------------------------------|----------|--------|------------|------------------|
| Vanilla yield (kg/ha) | Intercept                         | 9.005    | 8.681  | 0.804      | <0.001           |
|                       | Vanilla planting density (no/ha)  | 2.901    | 20.794 | 0.415      | <b>&lt;0.001</b> |
|                       | Pollination labour input (hrs/ha) | 0.897    | 22.621 | 0.469      | 0.069            |
|                       | Vanilla vine length (cm)          | 2.650    | 19.528 | 0.393      | <b>&lt;0.001</b> |
|                       | Delta Marginal R <sup>2</sup>     | 0.688    |        |            |                  |
|                       | Delta Conditional R <sup>2</sup>  | 0.883    |        |            |                  |

117

118 **Supplementary Table 15:** Model fits of glmmTMB model of tree, herbaceous plant, bird, amphibian, reptile, butterfly and ant richness depending on  
 119 environmental and management variables using single term deletion with the *anova* function from the R stats package with all terms significant at <0.05.  
 120 Significant p-values highlighted in bold. Chi-square values based on one-sided Chi-square tests displayed as  $\chi^2$ .  
 121

| Variables                       | Trees    |              | Herbaceous plants |              | Birds    |         | Amphibians |              | Reptiles |              | Butterflies |              | Ants     |         |
|---------------------------------|----------|--------------|-------------------|--------------|----------|---------|------------|--------------|----------|--------------|-------------|--------------|----------|---------|
|                                 | $\chi^2$ | p-value      | $\chi^2$          | p-value      | $\chi^2$ | p-value | $\chi^2$   | p-value      | $\chi^2$ | p-value      | $\chi^2$    | p-value      | $\chi^2$ | p-value |
| Canopy closure (%)              | 5.374    | <b>0.020</b> | 0.888             | 0.346        | 0.009    | 0.923   | 1.373      | 0.241        | 6.477    | <b>0.011</b> | 0.052       | 0.819        | 3.497    | 0.062   |
| Soil characteristics (PC1)      | 3.456    | 0.063        | 4.741             | 0.029        | 2.311    | 0.129   | 1.171      | 0.279        | 0.097    | 0.755        | 5.090       | <b>0.024</b> | 0.344    | 0.558   |
| Slope (°)                       | 0.541    | 0.462        | 0.090             | 0.764        | 0.003    | 0.953   | 4.404      | <b>0.036</b> | 0.285    | 0.593        | 0.456       | 0.499        | 0.941    | 0.332   |
| Landscape forest cover (%)      | 4.900    | <b>0.027</b> | 1.433             | 0.231        | 0.542    | 0.462   | 5.696      | <b>0.017</b> | 0.437    | 0.509        | 2.899       | 0.089        | 0.770    | 0.380   |
| Understory vegetation cover (%) | 1.540    | 0.215        | 0.395             | 0.530        | 0.822    | 0.365   | 0.002      | 0.964        | 3.851    | <b>0.050</b> | 4.388       | <b>0.036</b> | 0.121    | 0.728   |
| Elevation (m)                   | 0.824    | 0.364        | 6.670             | <b>0.010</b> | 0.612    | 0.434   | 0.170      | 0.681        | 2.763    | 0.096        | 1.797       | 0.180        | 1.780    | 0.182   |
| Planting density (no/ha)        | 9.325    | <b>0.002</b> | 4.006             | <b>0.045</b> | 2.080    | 0.149   | 0.817      | 0.366        | 0.003    | 0.958        | 0.606       | 0.436        | 0.118    | 0.731   |
| Pollination (hrs/ha)            | 0.156    | 0.693        | 0.056             | 0.812        | 0.309    | 0.578   | 1.671      | 0.196        | 2.578    | 0.108        | 0.127       | 0.722        | 1.041    | 0.308   |
| Vanilla vine length (cm)        | 10.034   | <b>0.002</b> | 3.461             | <b>0.063</b> | 1.164    | 0.281   | 2.367      | 0.124        | 11.156   | <b>0.001</b> | 1.108       | 0.293        | 2.065    | 0.151   |
| Vanilla plant age (yrs)         | 0.104    | 0.747        | 2.171             | 0.141        | 0.467    | 0.494   | 1.773      | 0.183        | 0.242    | 0.623        | 0.034       | 0.855        | 0.736    | 0.391   |

122

123 **Supplementary Table 16:** Model fits of glmmTMB model of endemic tree, endemic herbaceous plant, endemic bird, endemic amphibian, endemic reptile,  
 124 endemic butterfly and endemic ant richness depending on environmental and management variables using single term deletion with the *anova* function from  
 125 the R stats package with all terms significant at <0.05. Significant p-values highlighted in bold. Chi-square values based on one-sided Chi-square tests displayed  
 126 as  $\chi^2$ .  
 127

| Variables                       | Endemic trees |              | Endemic herbaceous plants |              | Endemic birds |              | Endemic amphibians |              | Endemic reptiles |              | Endemic butterflies |              | Endemic ants |              |
|---------------------------------|---------------|--------------|---------------------------|--------------|---------------|--------------|--------------------|--------------|------------------|--------------|---------------------|--------------|--------------|--------------|
|                                 | $\chi^2$      | p-value      | $\chi^2$                  | p-value      | $\chi^2$      | p-value      | $\chi^2$           | p-value      | $\chi^2$         | p-value      | $\chi^2$            | p-value      | $\chi^2$     | p-value      |
| Canopy closure (%)              | 0.002         | 0.968        | 6.240                     | <b>0.012</b> | 0.050         | 0.823        | 1.169              | 0.280        | 5.781            | <b>0.016</b> | 0.553               | 0.457        | 9.348        | <b>0.002</b> |
| Soil characteristics (PC1)      | 14.106        | <b>0.000</b> | 2.367                     | 0.124        | 3.870         | <b>0.049</b> | 3.442              | 0.064        | 4.188            | <b>0.041</b> | 5.345               | <b>0.021</b> | 1.927        | 0.165        |
| Slope (°)                       | 3.478         | 0.062        | 2.123                     | 0.145        | 0.004         | 0.949        | 4.723              | <b>0.030</b> | 0.333            | 0.564        | 0.000               | 0.993        | 3.608        | 0.058        |
| Landscape forest cover (%)      | 13.278        | <b>0.000</b> | 6.328                     | <b>0.012</b> | 0.167         | 0.683        | 4.307              | <b>0.038</b> | 0.013            | 0.909        | 0.867               | 0.352        | 6.330        | <b>0.012</b> |
| Understory vegetation cover (%) | 3.697         | 0.055        | 0.043                     | 0.835        | 5.007         | <b>0.025</b> | 0.000              | 0.988        | 2.632            | 0.105        | 4.354               | <b>0.037</b> | 0.418        | 0.518        |
| Elevation (m)                   | 2.155         | 0.142        | 3.593                     | 0.058        | 2.412         | 0.120        | 0.045              | 0.832        | 0.166            | 0.684        | 0.377               | 0.539        | 2.064        | 0.151        |
| Planting density (no/ha)        | 14.304        | <b>0.000</b> | 12.092                    | <b>0.001</b> | 0.007         | 0.931        | 1.191              | 0.275        | 0.741            | 0.389        | 0.047               | 0.828        | 0.345        | 0.557        |
| Pollination (hrs/ha)            | 0.033         | 0.857        | 2.862                     | 0.091        | 0.713         | 0.398        | 3.349              | 0.067        | 0.603            | 0.438        | 1.577               | 0.209        | 3.996        | <b>0.046</b> |
| Vanilla vine length (cm)        | 24.324        | <b>0.000</b> | 0.001                     | 0.973        | 1.156         | 0.282        | 1.342              | 0.247        | 4.919            | <b>0.027</b> | 0.809               | 0.368        | 3.420        | 0.064        |
| Vanilla plant age (yrs)         | 1.215         | 0.270        | 0.017                     | 0.898        | 2.215         | 0.137        | 1.599              | 0.206        | 0.008            | <b>0.008</b> | 0.148               | 0.701        | 0.006        | 0.937        |

128

129 **Supplementary Table 17:** Determinants of species richness in 30 vanilla agroforests (27 vanilla  
130 agroforests for tree richness). Estimates of predictor coefficients from the best generalized linear  
131 mixed model. Model selection was performed by single term deletion using the anova function from  
132 the R stats package with all terms significant at <0.05. Chi-square and Df results are based on analysis  
133 of deviance results (one-sided Type II Wald chi-square tests). The p-values are based on a two-sided  
134 t-test testing whether the mean is different from 0. Significant p-values (<0.05) are highlighted in  
135 bold. Marginally significant values are written in italic (0.050 ≤ p < 0.100). Marginal R<sup>2</sup> is the  
136 variance explained by fixed effects while conditional R<sup>2</sup> is the variance explained by fixed and  
137 marginal effects together.  
138

| Taxa                             | Parameter                        | $\chi^2$  | Df, Df <sub>resid</sub> | Estimate | Std. Error | p-value          |        |
|----------------------------------|----------------------------------|-----------|-------------------------|----------|------------|------------------|--------|
| Trees                            | Intercept                        |           |                         | 2.768    | 0.110      | <0.001           |        |
|                                  | Landscape forest cover (%)       | 13.249    | 1.000                   | 0.270    | 0.074      | <b>&lt;0.001</b> |        |
|                                  | Planting density (no/ha)         | 5.498     | 1.000                   | -0.155   | 0.066      | <b>0.019</b>     |        |
|                                  | Vanilla vine length (cm)         | 15.363    | 1.000                   | -0.221   | 0.056      | <b>&lt;0.001</b> |        |
|                                  | Canopy closure (%)               | 12.043    | 1.000                   | 0.284    | 0.082      | <b>&lt;0.001</b> |        |
|                                  | Delta Marginal R <sup>2</sup>    |           |                         |          |            |                  | 0.670  |
|                                  | Delta Conditional R <sup>2</sup> |           |                         |          |            |                  | 0.884  |
| Herbaceous plants                | Intercept                        |           |                         | 2.991    | 0.058      | <0.001           |        |
|                                  | Elevation (m)                    | 26.610    | 1.000                   | 0.283    | 0.055      | <b>&lt;0.001</b> |        |
|                                  | Soil characteristics (PC1)       | 3.800     | 1.000                   | 0.111    | 0.057      | <i>0.051</i>     |        |
|                                  | Planting density (no/ha)         | 1.374     | 1.000                   | 0.067    | 0.058      | 0.241            |        |
|                                  | Delta Marginal R <sup>2</sup>    |           |                         |          |            |                  | 0.099  |
|                                  | Delta Conditional R <sup>2</sup> |           |                         |          |            |                  | 0.224  |
|                                  | Amphibians                       | Intercept |                         |          | 1.498      | 0.069            | <0.001 |
| Slope (°)                        |                                  | 5.319     | 1.000                   | -0.125   | 0.054      | <b>0.021</b>     |        |
| Landscape forest cover (%)       |                                  | 3.477     | 1.000                   | -0.097   | 0.052      | <i>0.062</i>     |        |
| Delta Marginal R <sup>2</sup>    |                                  |           |                         |          |            |                  | 0.099  |
| Delta Conditional R <sup>2</sup> |                                  |           |                         |          |            |                  | 0.224  |
| Reptiles                         | Intercept                        |           |                         | 2.011    | 0.071      | <0.001           |        |
|                                  | Vanilla vine length (cm)         | 5.470     | 1.000                   | -0.166   | 0.071      | <b>0.019</b>     |        |
|                                  | Canopy closure (%)               | 5.853     | 1.000                   | 0.178    | 0.074      | <b>0.016</b>     |        |
|                                  | Understory vegetation cover (%)  | 0.888     | 1.000                   | 0.072    | 0.077      | 0.346            |        |
|                                  | Delta Marginal R <sup>2</sup>    |           |                         |          |            |                  | 0.310  |
|                                  | Delta Conditional R <sup>2</sup> |           |                         |          |            |                  | 0.328  |
| Butterflies                      | Intercept                        | 2.355     | 0.075                   | 2.355    | 0.075      | <0.001           |        |
|                                  | Soil characteristics (PC1)       | 0.011     | 1.000                   | 0.175    | 0.069      | <b>0.011</b>     |        |
|                                  | Understory vegetation cover (%)  | 0.077     | 1.000                   | -0.127   | 0.072      | <i>0.077</i>     |        |
|                                  | Delta Marginal R <sup>2</sup>    |           |                         |          |            |                  | 0.200  |
|                                  | Delta Conditional R <sup>2</sup> |           |                         |          |            |                  | 0.365  |

139  
140 **Supplementary Table 18:** Determinants of endemic species richness in 30 vanilla agroforests (27  
141 vanilla agroforests for endemic tree richness). Estimates of predictor coefficients from the best  
142 generalized linear mixed model. Model selection was performed by single term deletion using the  
143 anova function from the R stats package with all terms significant at <0.05. Chi-square and Df results  
144 are based on analysis of deviance results (one-sided Type II Wald chi-square tests). The p-values are

145 based on a two-sided t-test testing whether the mean is different from 0. Significant p-values (<0.05)  
 146 are highlighted in bold. Marginal R<sup>2</sup> is the variance explained by fixed effects while conditional R<sup>2</sup> is  
 147 the variance explained by fixed and marginal effects together.

| Taxa                      | Parameter                        | $\chi^2$ | Df, Df <sub>resid</sub> | Estimate | Std. Error | p-value          |       |
|---------------------------|----------------------------------|----------|-------------------------|----------|------------|------------------|-------|
| Endemic Trees             | Intercept                        |          |                         | 1.371    | 0.194      | <0.001           |       |
|                           | Soil characteristics (PC1)       | 13.073   | 1                       | -0.486   | 0.134      | <b>&lt;0.001</b> |       |
|                           | Landscape forest cover (%)       | 59.906   | 1                       | 0.827    | 0.107      | <b>&lt;0.001</b> |       |
|                           | Vanilla vine length (cm)         | 28.468   | 1                       | -0.553   | 0.104      | <b>&lt;0.001</b> |       |
|                           | Planting density (no/ha)         | 12.259   | 1                       | -0.337   | 0.096      | <b>&lt;0.001</b> |       |
|                           | Delta Marginal R <sup>2</sup>    |          |                         |          |            |                  | 0.853 |
|                           | Delta Conditional R <sup>2</sup> |          |                         |          |            |                  | 1     |
| Endemic herbaceous plants | Intercept                        |          |                         | 1.022    | 0.069      | <0.001           |       |
|                           | Landscape forest cover (%)       | 13.724   | 1                       | 0.236    | 0.064      | <b>&lt;0.001</b> |       |
|                           | Canopy closure (%)               | 3.444    | 1                       | 0.145    | 0.078      | 0.063            |       |
|                           | Planting density (no/ha)         | 7.861    | 1                       | 0.176    | 0.063      | <b>0.005</b>     |       |
|                           | Delta Marginal R <sup>2</sup>    |          |                         |          |            |                  | 0.241 |
|                           | Delta Conditional R <sup>2</sup> |          |                         |          |            |                  | NA    |
| Endemic Birds             | Intercept                        |          |                         | 0.150    | 0.179      | 0.402            |       |
|                           | Soil characteristics (PC1)       | 6.58     | 1                       | -0.504   | 0.196      | <b>0.010</b>     |       |
|                           | Understory vegetation cover (%)  | 6.60     | 1                       | 0.460    | 0.179      | <b>0.010</b>     |       |
|                           | Delta Marginal R <sup>2</sup>    |          |                         |          |            |                  | 0.273 |
|                           | Delta Conditional R <sup>2</sup> |          |                         |          |            |                  | 0.273 |
| Endemic Amphibians        | Intercept                        |          |                         | 1.335    | 0.075      | <0.001           |       |
|                           | Slope (°)                        | 2.812    | 1                       | -0.111   | 0.066      | 0.094            |       |
|                           | Landscape forest cover (%)       | 0.869    | 1                       | -0.059   | 0.064      | 0.351            |       |
|                           | Delta Marginal R <sup>2</sup>    |          |                         |          |            |                  | 0.047 |
|                           | Delta Conditional R <sup>2</sup> |          |                         |          |            |                  | 0.129 |
| Endemic Reptiles          | Intercept                        |          |                         | 1.661    | 0.073      | <0.001           |       |
|                           | Canopy closure (%)               | 5.679    | 1                       | 0.136    | 0.057      | <b>0.017</b>     |       |
|                           | Soil characteristics (PC1)       | 5.157    | 1                       | 0.133    | 0.059      | <b>0.023</b>     |       |
|                           | Vanilla vine length (cm)         | 3.331    | 1                       | -0.096   | 0.052      | 0.068            |       |
|                           | Delta Marginal R <sup>2</sup>    |          |                         |          |            |                  | 0.001 |
|                           | Delta Conditional R <sup>2</sup> |          |                         |          |            |                  | 0.638 |
| Endemic Butterflies       | Intercept                        |          |                         | 1.876    | 0.044      | <0.001           |       |
|                           | Understory vegetation cover (%)  | 3.472    | 1                       | -0.092   | 0.049      | 0.062            |       |
|                           | Soil characteristics (PC1)       | 5.294    | 1                       | 0.109    | 0.047      | <b>0.021</b>     |       |
|                           | Delta Marginal R <sup>2</sup>    |          |                         |          |            |                  | 0.033 |
|                           | Delta Conditional R <sup>2</sup> |          |                         |          |            |                  | NA    |
| Endemic Ants              | Intercept                        |          |                         | 1.381    | 0.096      | <0.001           |       |

|  |                                  |        |   |       |       |              |
|--|----------------------------------|--------|---|-------|-------|--------------|
|  | Canopy closure (%)               | 12.075 | 1 | 0.387 | 0.111 | <b>0.001</b> |
|  | Landscape forest cover (%)       | 6.459  | 1 | 0.214 | 0.084 | <b>0.011</b> |
|  | Pollination (hrs/ha)             | 1.991  | 1 | 0.129 | 0.091 | 0.158        |
|  | Delta Marginal R <sup>2</sup>    |        |   |       |       | 0.532        |
|  | Delta Conditional R <sup>2</sup> |        |   |       |       | 0.532        |

148

149 **Supplementary Table 19:** Icon attribution for Figure 1 & 2

150

| Name                                                  | Author           | Link                                                                                                                                          |
|-------------------------------------------------------|------------------|-----------------------------------------------------------------------------------------------------------------------------------------------|
| Neobatrachia<br>(Amphibian icon in Fig. 1 & 2)        | Public Domain    | <a href="http://phylopic.org/image/c07ce7b7-5fb5-484f-83a0-567bb0795e18/">http://phylopic.org/image/c07ce7b7-5fb5-484f-83a0-567bb0795e18/</a> |
| Dicrurus leucophaeus<br>(Bird icon in Fig. 1 & 2)     | Ferran Sayol     | <a href="http://phylopic.org/image/69c936f5-7ed7-4c72-9081-ac860f1e89d1/">http://phylopic.org/image/69c936f5-7ed7-4c72-9081-ac860f1e89d1/</a> |
| Leptanillini<br>(Ant icon in Fig. 1 & 2)              | Public Domain    | <a href="http://phylopic.org/image/45ccedd3-d5cb-42e8-b158-7e027ab1ff22/">http://phylopic.org/image/45ccedd3-d5cb-42e8-b158-7e027ab1ff22/</a> |
| Platanus occidentalis L.<br>(Tree icon in Fig. 1 & 2) | Michele M Tobias | <a href="http://phylopic.org/image/806a6ae9-28a0-4dc6-beeb-f6129a44f10e/">http://phylopic.org/image/806a6ae9-28a0-4dc6-beeb-f6129a44f10e/</a> |
| Mediodactylus kotschy<br>(Reptile icon in Fig. 1 & 2) | Public Domain    | <a href="http://phylopic.org/image/6487de8d-0382-4ba7-b587-5fa2c1119f08/">http://phylopic.org/image/6487de8d-0382-4ba7-b587-5fa2c1119f08/</a> |
| Compositae<br>(Herbaceous plant icon in Fig. 1 & 2)   | Public Domain    | <a href="http://phylopic.org/image/39335c0c-f879-4df6-90d5-e4f65d90d04e/">http://phylopic.org/image/39335c0c-f879-4df6-90d5-e4f65d90d04e/</a> |
| Papilionini<br>(Butterfly icon in Fig. 1 & 2)         | Public Domain    | <a href="http://phylopic.org/image/f21829d7-6dfc-4b2f-991c-e16181c24d29/">http://phylopic.org/image/f21829d7-6dfc-4b2f-991c-e16181c24d29/</a> |

151

152 **Supplementary Table 20:** Mean, standard deviation, min and max value of all environmental and  
 153 management variables used for analysis depending on land-use history (VFAL=Fallow-derived vanilla,  
 154 VFOR=Forest-derived vanilla)

| Parameter                         | Land-use history | mean     | SD       | min      | max      |
|-----------------------------------|------------------|----------|----------|----------|----------|
| Elevation (m)                     | VFAL             | 155.500  | 185.627  | 25.000   | 644.000  |
| Elevation (m)                     | VFOR             | 187.700  | 246.795  | 20.000   | 819.000  |
| Slope (°)                         | VFAL             | 8.596    | 4.758    | 1.050    | 19.010   |
| Slope (°)                         | VFOR             | 7.758    | 5.944    | 2.620    | 17.990   |
| Canopy closure (%)                | VFAL             | 49.161   | 20.654   | 9.352    | 78.811   |
| Canopy closure (%)                | VFOR             | 72.176   | 12.653   | 51.362   | 88.215   |
| Planting density (plants/ha)      | VFAL             | 3535.897 | 1524.107 | 2132.987 | 8519.751 |
| Planting density (plants/ha)      | VFOR             | 2780.331 | 1178.714 | 1638.788 | 5775.310 |
| Vanilla plant age                 | VFAL             | 3.798    | 1.837    | 1.278    | 7.886    |
| Vanilla plant age                 | VFOR             | 5.667    | 4.694    | 1.568    | 13.395   |
| Soil characteristics (PC1)        | VFAL             | 0.498    | 2.078    | -3.616   | 4.433    |
| Soil characteristics (PC1)        | VFOR             | -0.996   | 0.938    | -2.334   | 0.961    |
| Pollination labour input (hrs/ha) | VFAL             | 340.620  | 226.731  | 52.414   | 824.690  |
| Pollination labour input (hrs/ha) | VFOR             | 232.179  | 196.052  | 62.163   | 667.951  |

|                                 |      |         |         |         |          |
|---------------------------------|------|---------|---------|---------|----------|
| Understory vegetation cover (%) | VFAL | 74.621  | 26.360  | 11.775  | 100.000  |
| Understory vegetation cover (%) | VFOR | 78.241  | 17.919  | 49.263  | 99.875   |
| Forest cover (%)                | VFAL | 11.296  | 13.328  | 0.000   | 42.056   |
| Forest cover (%)                | VFOR | 43.209  | 28.276  | 0.000   | 85.845   |
| Vanilla vine length (cm)        | VFAL | 676.227 | 266.541 | 308.853 | 1263.824 |
| Vanilla vine length (cm)        | VFOR | 733.450 | 301.026 | 219.889 | 1263.583 |
| Vanilla yield (kg/ha)           | VFAL | 105.721 | 113.060 | 0.000   | 371.552  |
| Vanilla yield (kg/ha)           | VFOR | 102.398 | 71.935  | 22.970  | 247.113  |

155

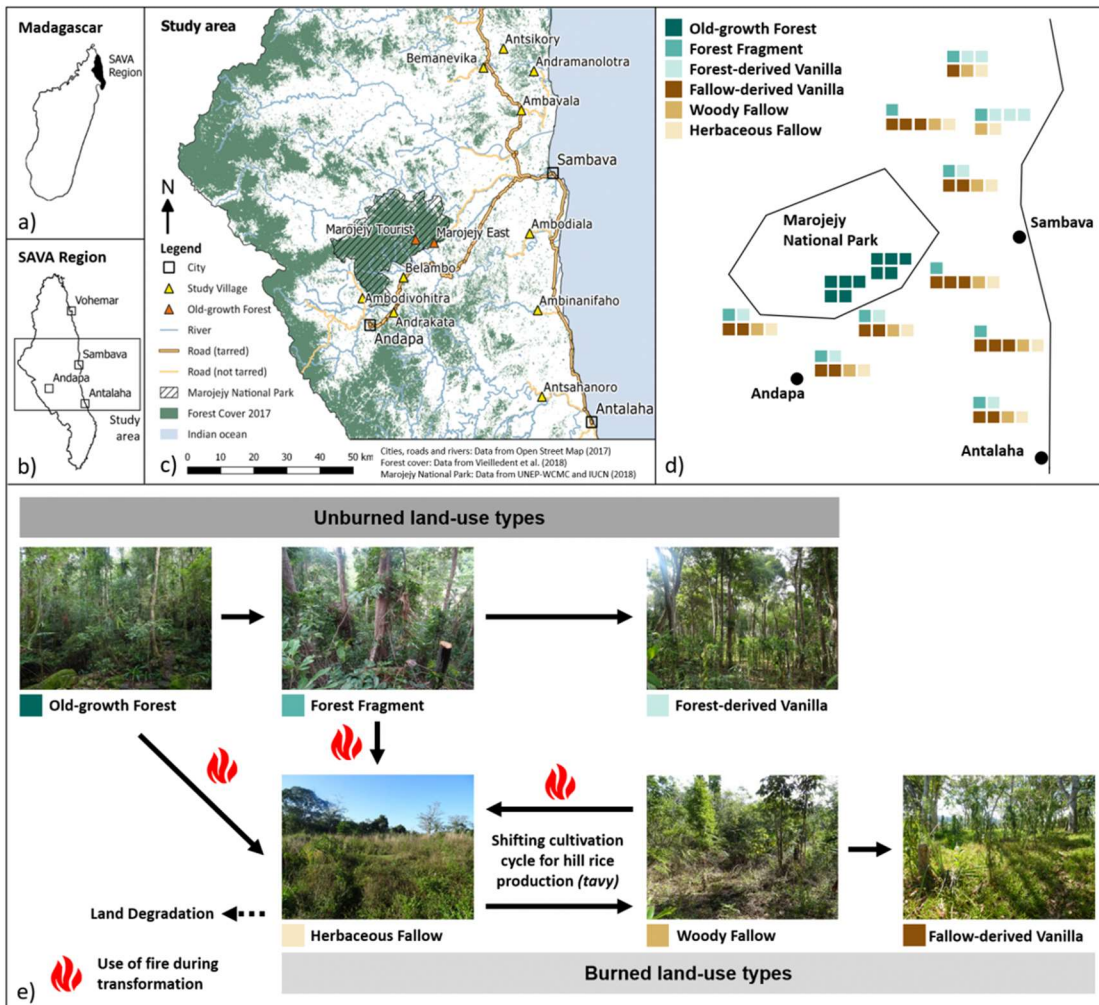

156

157 **Supplementary Figure 1:** Study design overview. a) The island of Madagascar in the Indian Ocean off  
 158 the coast of East Africa with the SAVA region indicated. b) SAVA region. c) Study area with forest  
 159 cover in 2017<sup>26</sup> roads, rivers, and the three main cities Sambava, Antalaha, and Andapa as well as the  
 160 10 study villages and Marojejy National Park with its two sampling sites therein. d) Schematic  
 161 overview of distribution of land-use types across 10 villages and two sampling sides in Marojejy  
 162 National Park. e) Overview of transformation pathways of unburned and burned land-use types in  
 163 the study region.



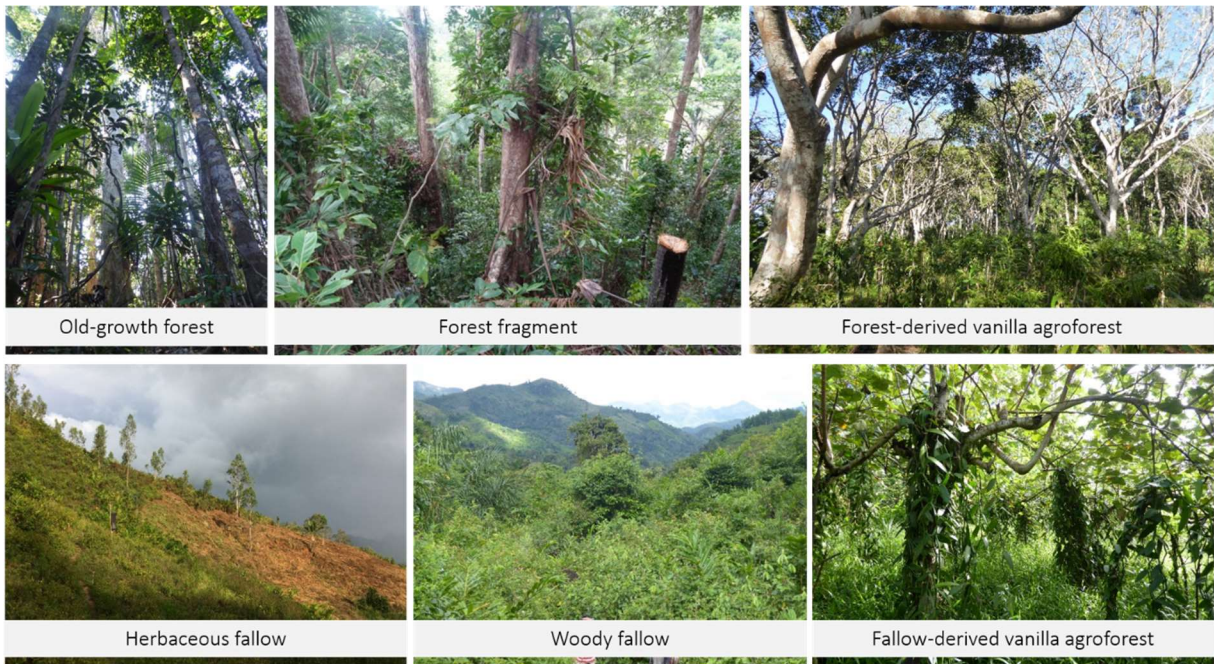

166 **Supplementary Figure 2:** Exemplary photos of sampled land-use types: Old-growth forest, Forest  
167 fragment, Forest-derived vanilla agroforest, Herbaceous fallow, Woody fallow, Fallow-derived vanilla  
168 agroforest (from top left to bottom right).

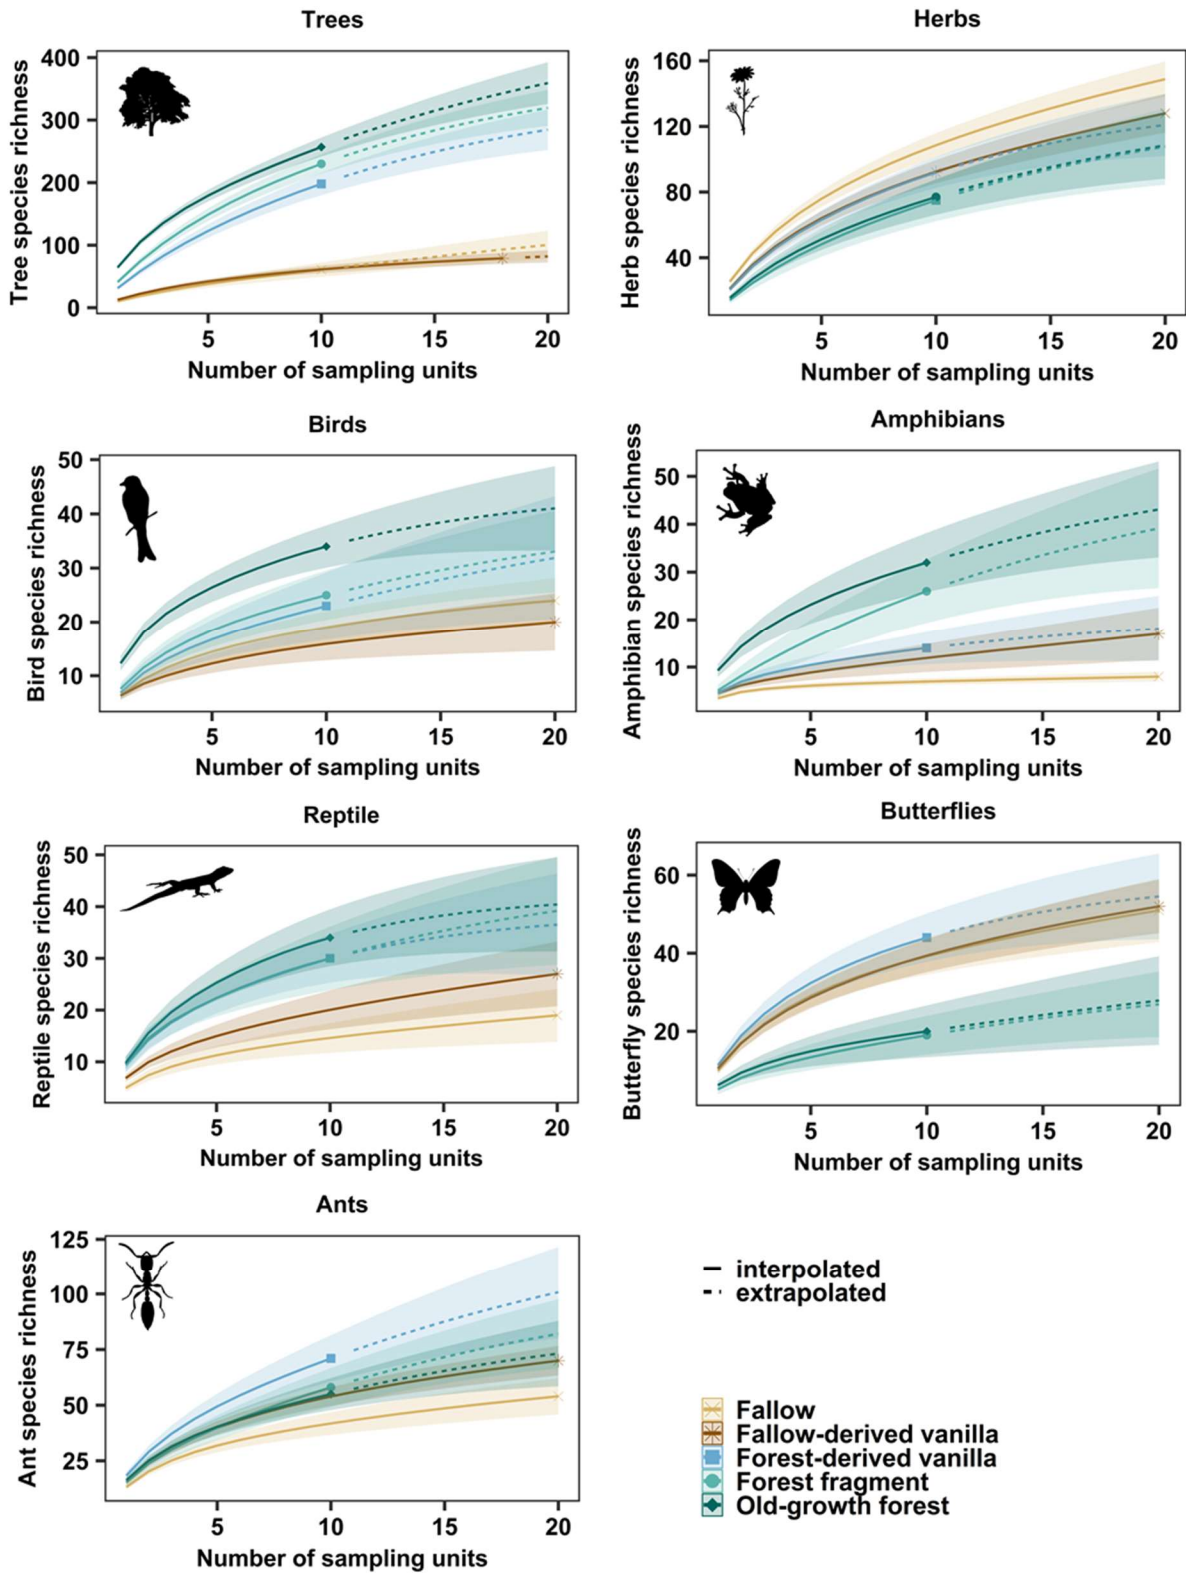

169

170 **Supplementary Figure 3:** Species accumulation curves for all 5 land-use types, shown by the  
 171 extrapolation curves based on species richness per sampling unit (Hill number  $q = 0$ ). The solid line  
 172 represents the interpolated total species number per sampling unit, whereas the dashed line  
 173 represents the extrapolated total species number per sampling unit. The shaded region represents  
 174 the 95% confidence intervals and were obtained using a bootstrap method based on 20 replications.  
 175 The solid dots/quadrats/triangles/crosses represent the reference samples. Non-overlapping of the

176 confidence intervals represents a significant difference between two or more land-use types. See  
 177 icon attribution in Supplementary Table 19.

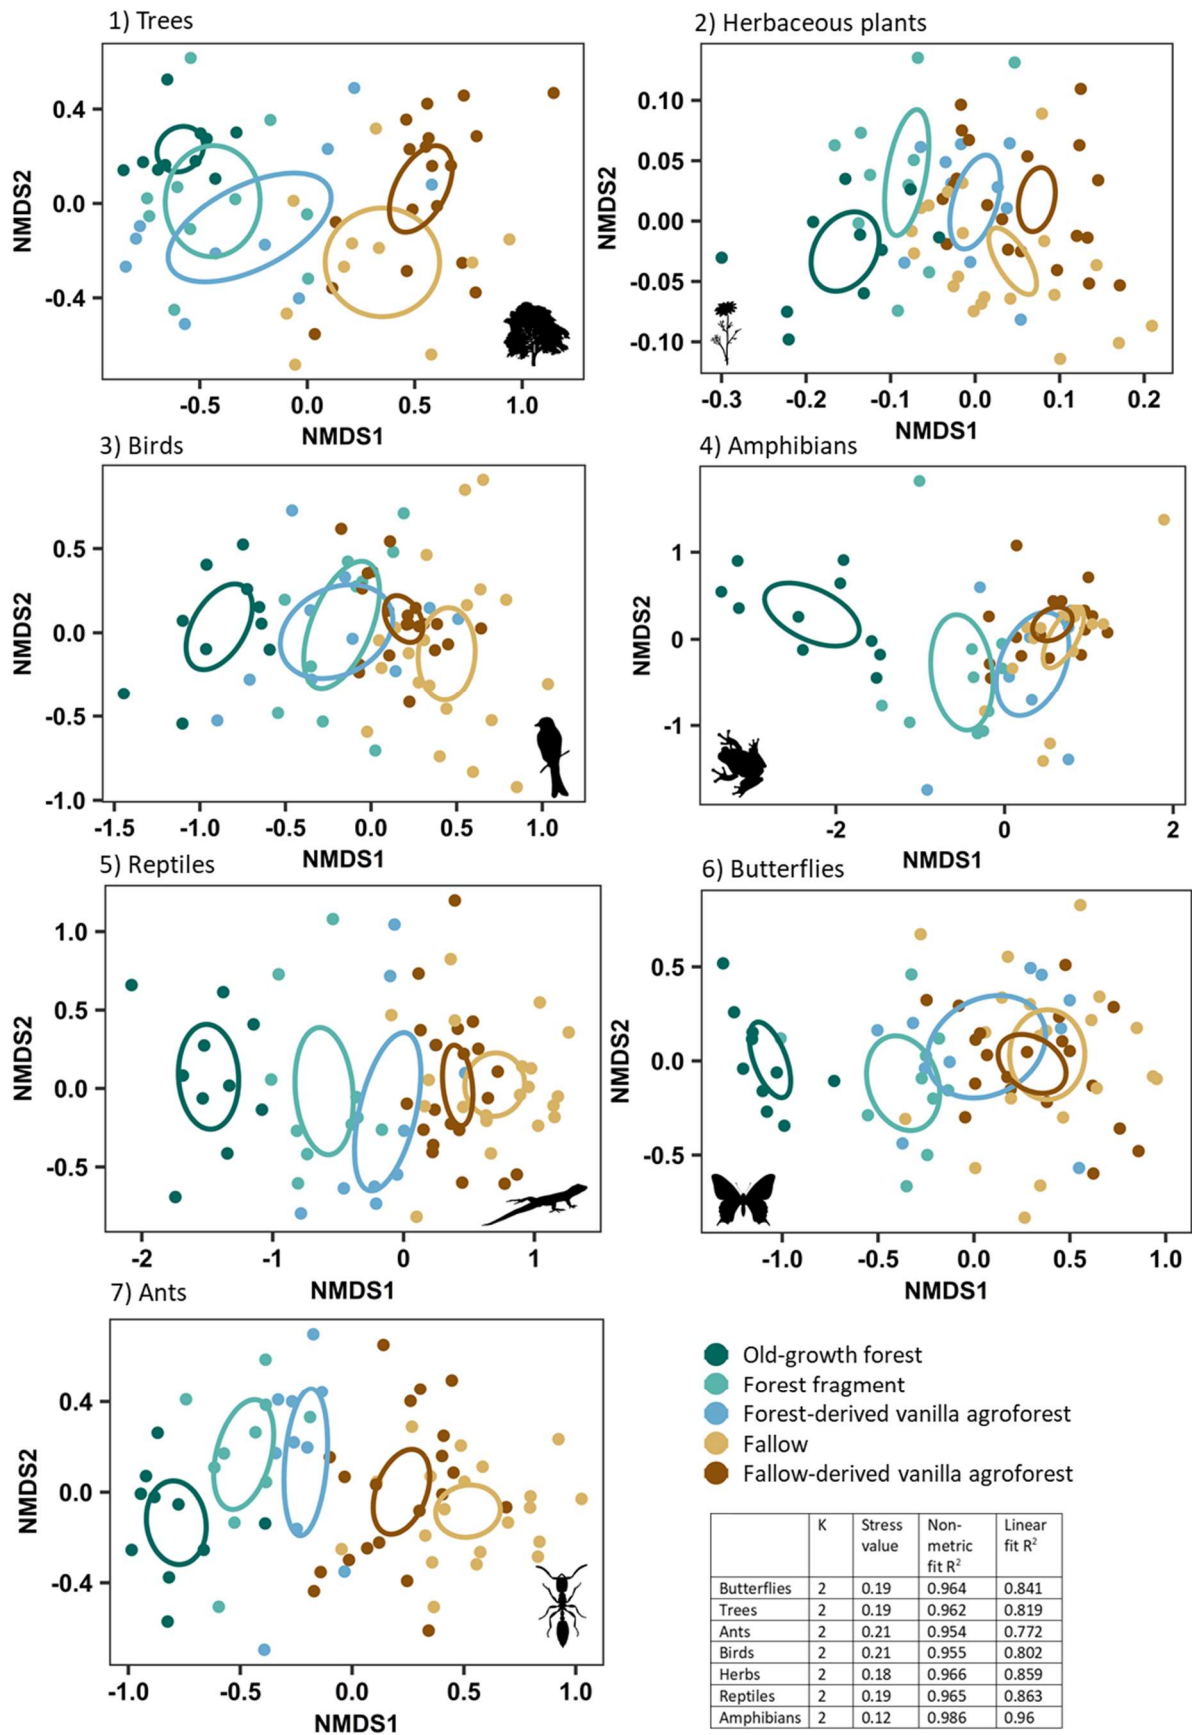

179 **Supplementary Figure 4:** Species composition of the five land-use types as revealed by non-metric  
180 multidimensional scaling (NMDS) based on Jaccard dissimilarity. See icon attribution in  
181 Supplementary Table 19.

182

183

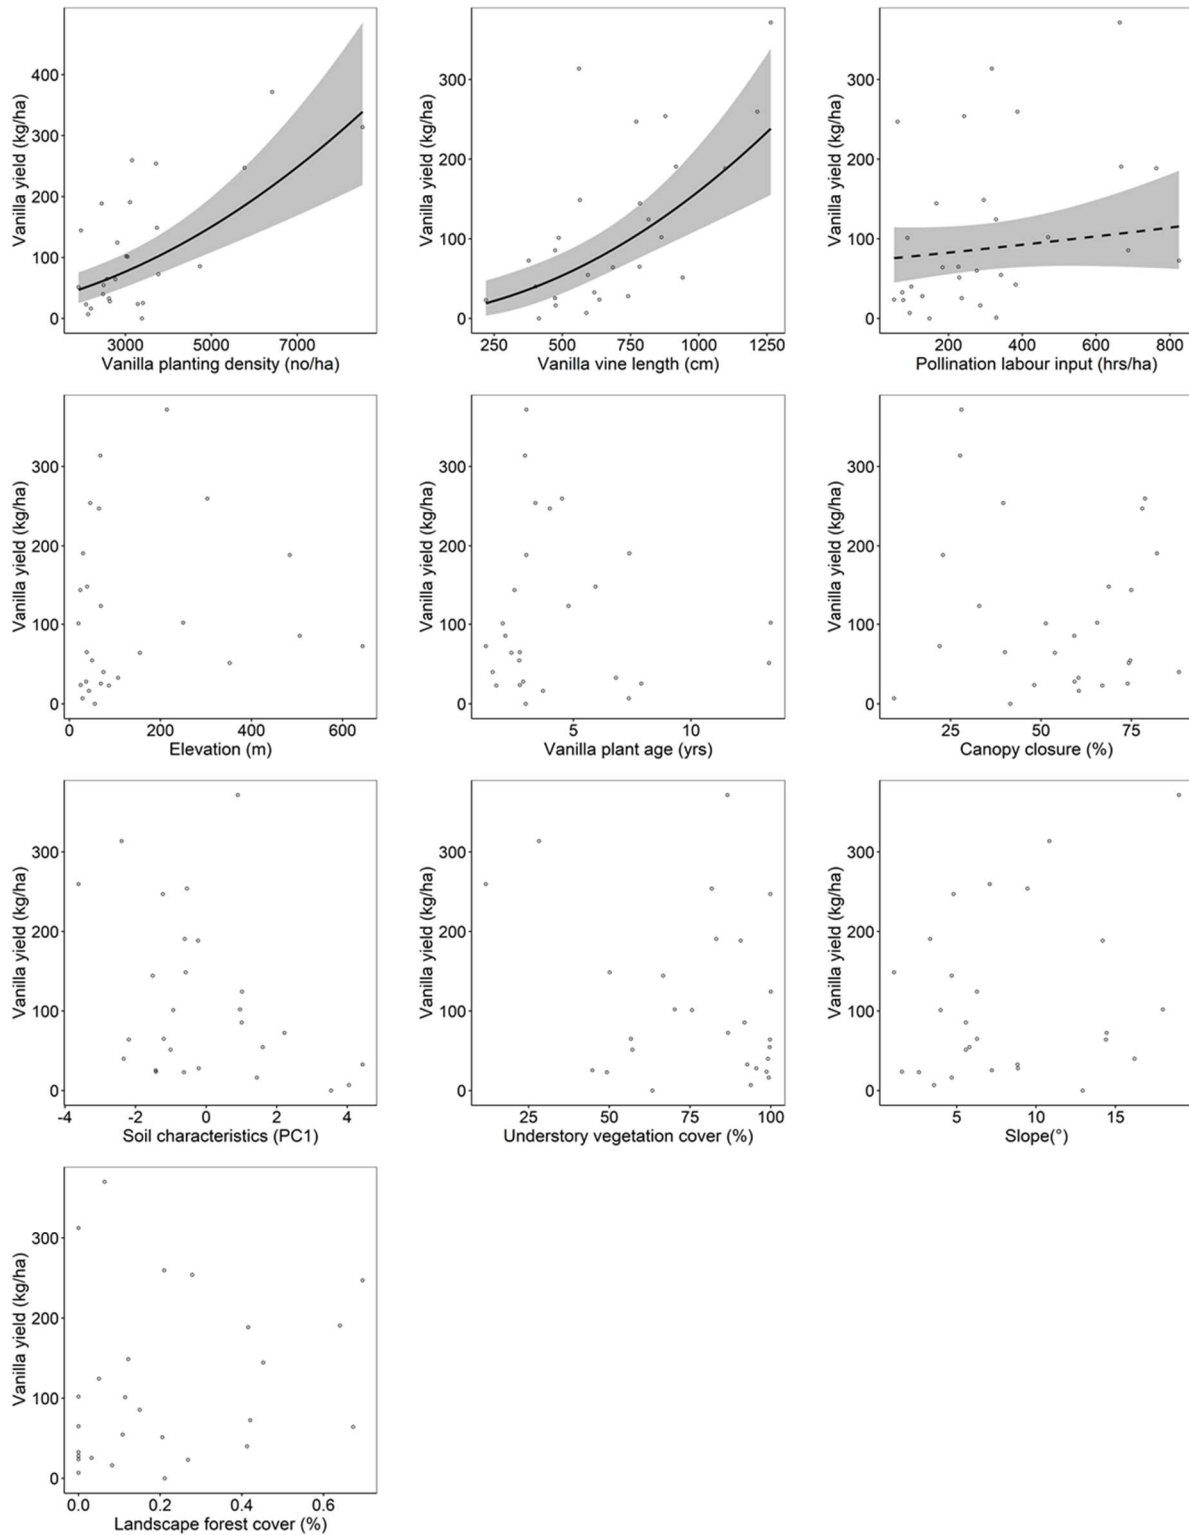

184

185 **Supplementary Figure 5:** Vanilla yield kg/ha depending on planting density, vanilla vine length,  
186 pollination labour input, elevation, vanilla plant age, canopy closure, soil characteristics, understory

187 vegetation cover, slope and landscape forest cover. We used a linear mixed effect model with yield  
 188 sqrt-transformed. Dots are raw data and solid and dashed lines indicate statistically significant ( $p <$   
 189  $0.050$ ) and marginally significant ( $0.050 \leq p < 0.100$ ), respectively. Trend lines show average  
 190 values of the back-transformed model predictions of the final model after using likelihood ratio tests  
 191 using maximum likelihood estimation, shaded areas indicate 95% confidence intervals.  
 192

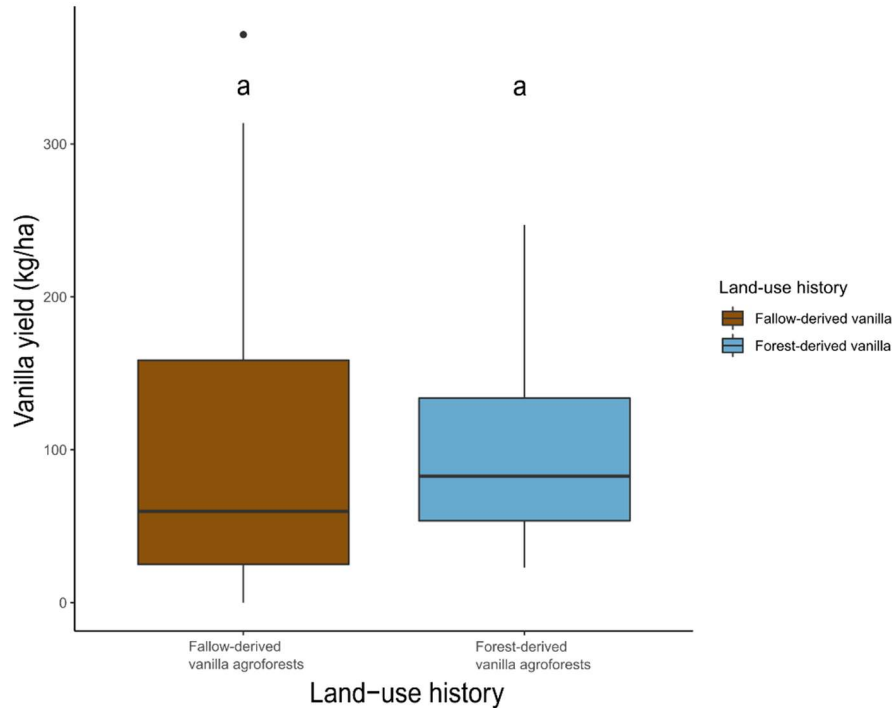

193

194 **Supplementary Figure 6:** Vanilla yield (kg/ha) of 30 vanilla agroforests (n=20 fallow-derived and 10  
 195 forest-derived agroforests) depending on land-use history. Linear mixed model with square-root  
 196 transformed yield depending on land-use history with village as random effect. Multiple comparisons  
 197 of means: VFOR-VFAL:  $E=0.7719$ ;  $SE=1.9407$ ;  $P=0.691$ . Shown are boxplots of plot-level endemic  
 198 mean normalized richness (A) and endemic species richness of seven taxa individually (B-H) in old-  
 199 growth forest (FOR), forest fragment (FF), forest-derived vanilla agroforest (VFOR), fallow (FAL) and  
 200 fallow-derived vanilla agroforest (VFAL) (n=10 for FOR, FF and VFOR & n=20 for FAL and VFAL). The  
 201 line inside the boxplot represents the median of each land-use type. The lower and upper boundaries  
 202 of the boxplot show the 25th-75th percentiles of the observational data, respectively and the  
 203 whiskers show the 1.5 interquartile range. Outliers are shown as dots.

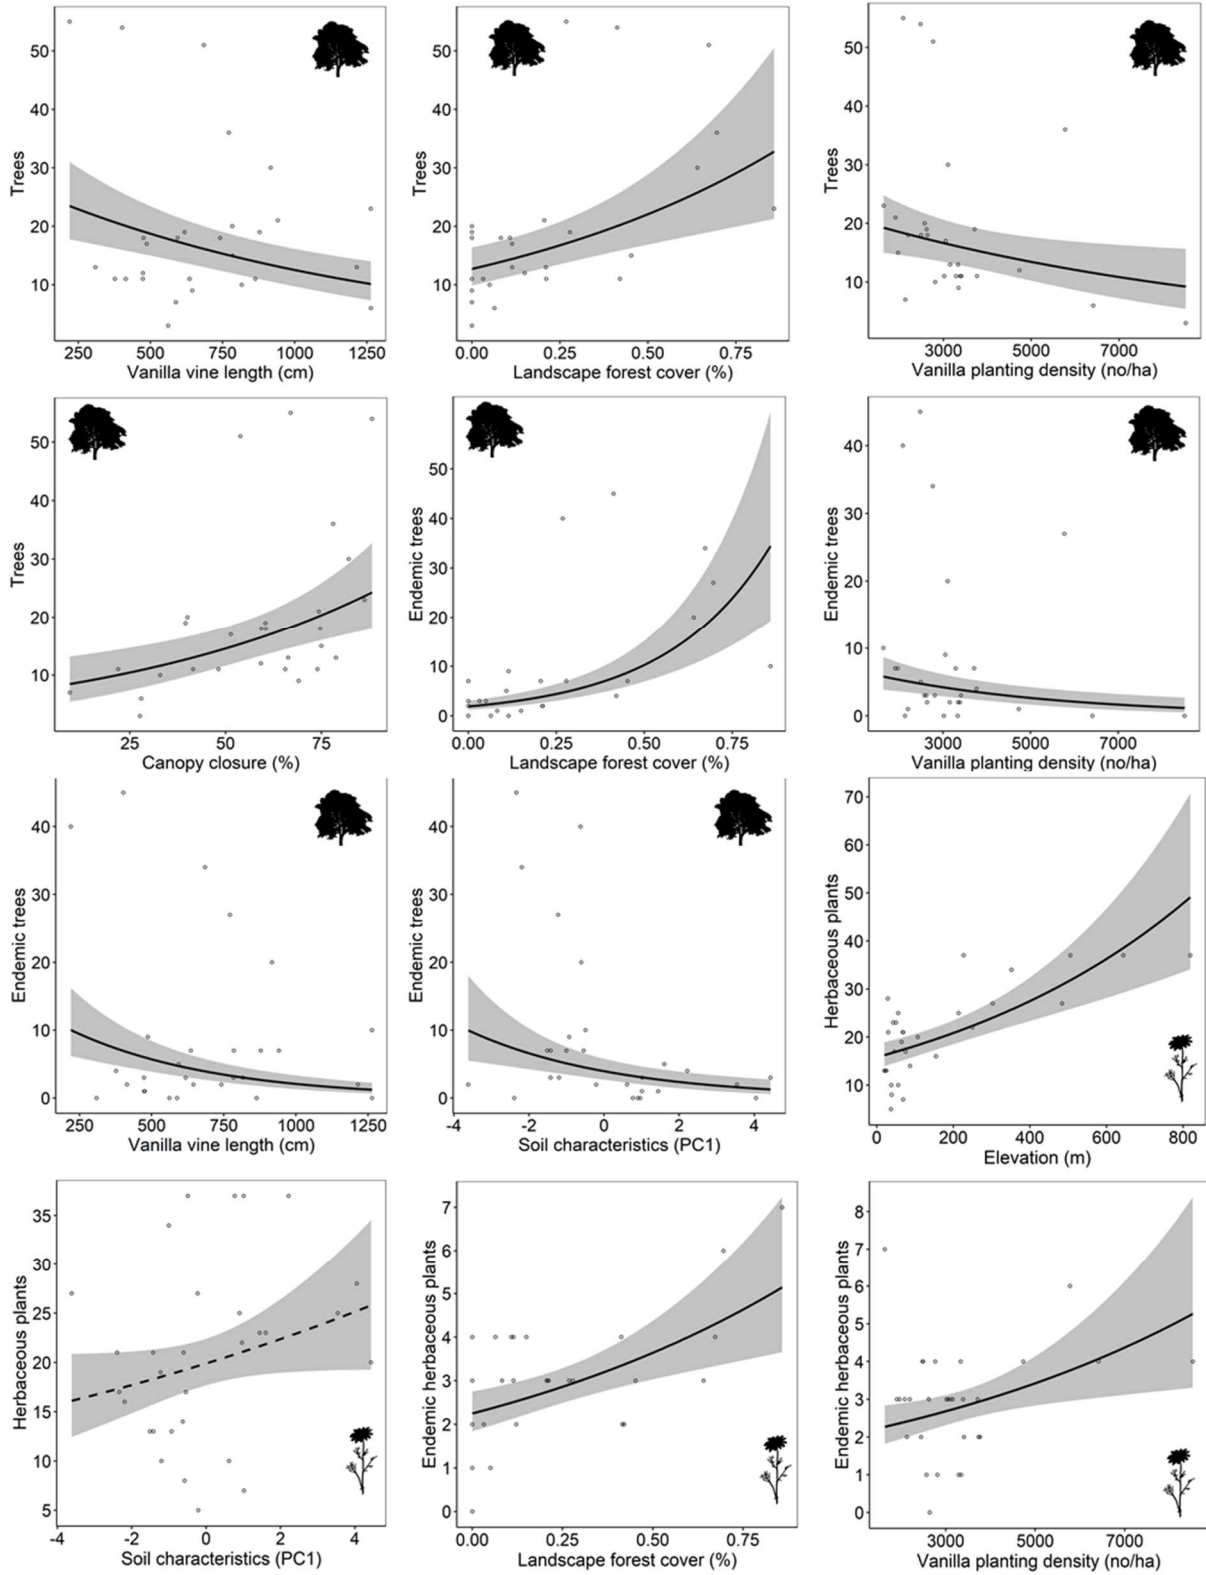

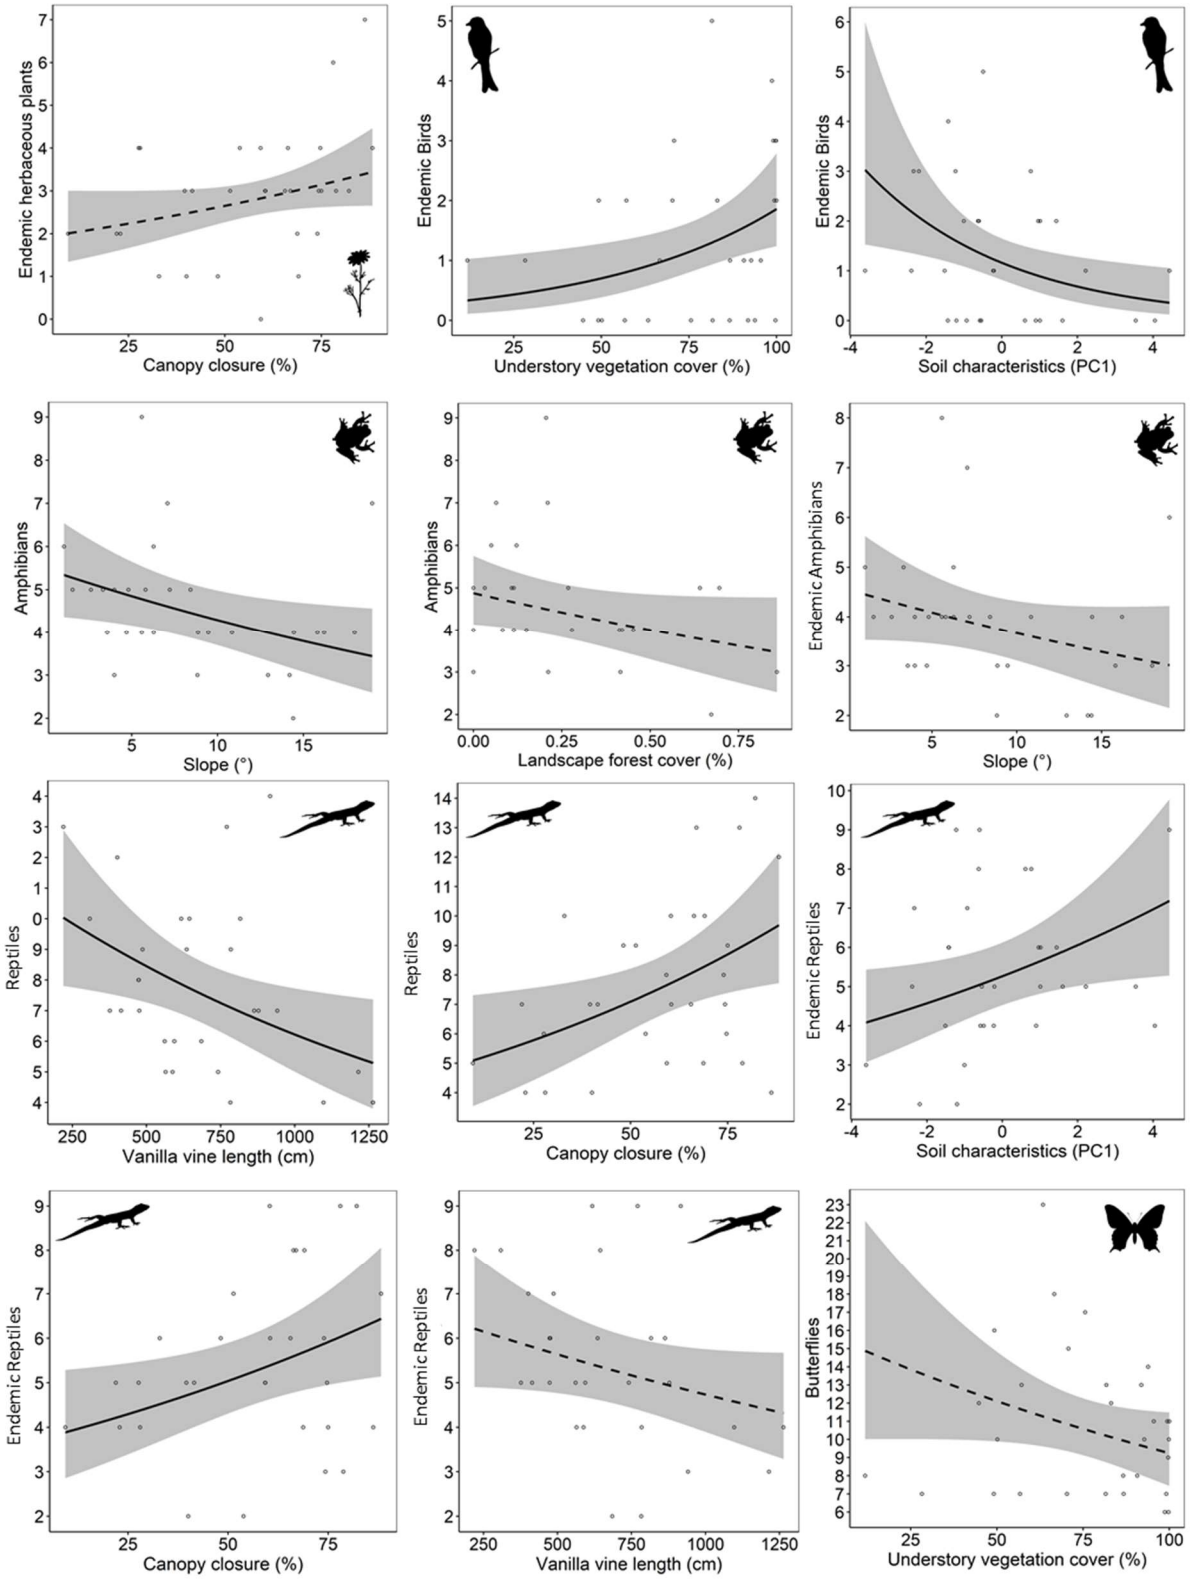

205

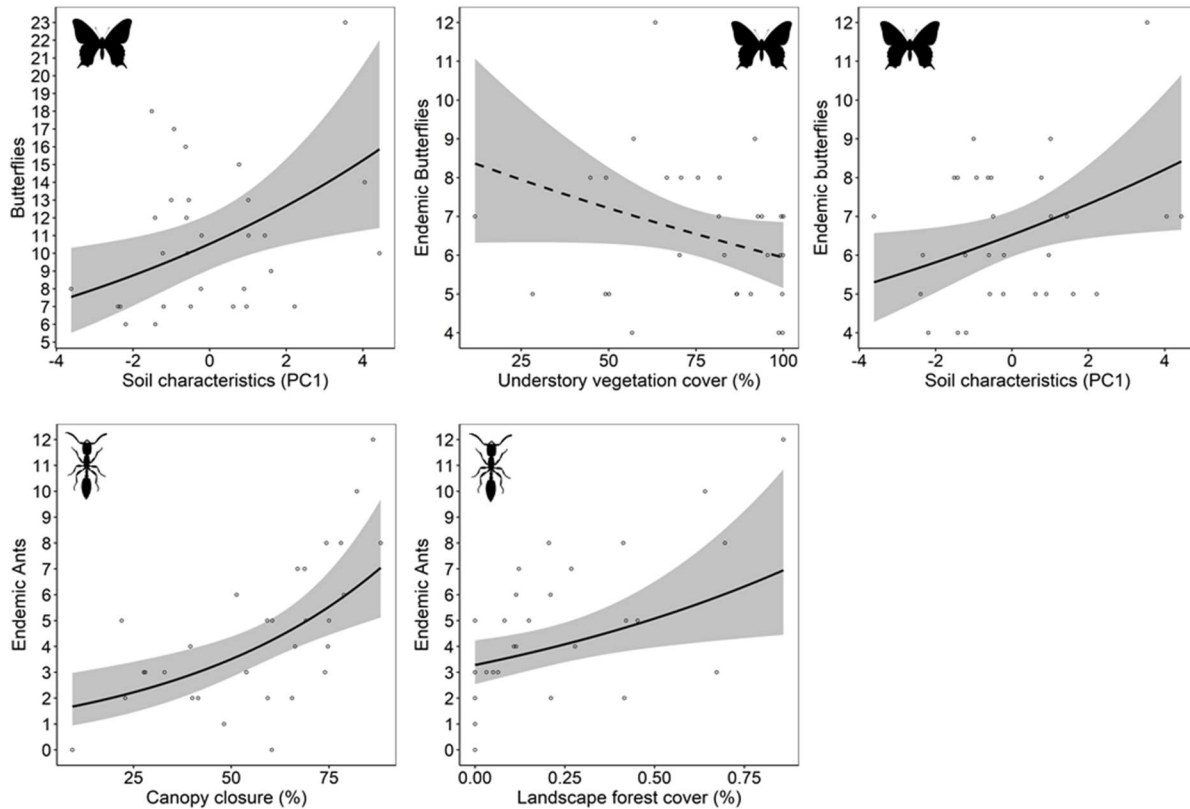

206

207 **Supplementary Figure 7:** (Endemic) species richness of seven different taxa depending on planting  
 208 density, vanilla vine length, pollination labour input, elevation, vanilla plant age, canopy closure, soil  
 209 characteristics, understory vegetation cover, slope and landscape forest cover. We used glmmTMB  
 210 models. Dots are raw data and solid (statistically significant,  $P < 0.05$ ) or dashed (marginally significant,  
 211  $0.05 < p < 0.1$ ) trend lines show average values of back-transformed model predictions of the final  
 212 model after using likelihood ratio tests using maximum likelihood estimation, shaded areas indicate  
 213 95% confidence intervals. See icon attribution in Supplementary Table 19.  
 214

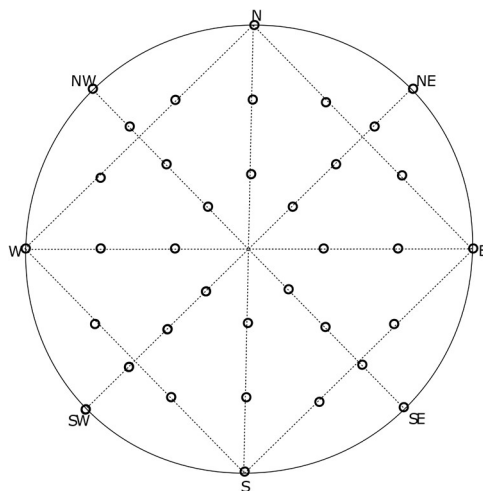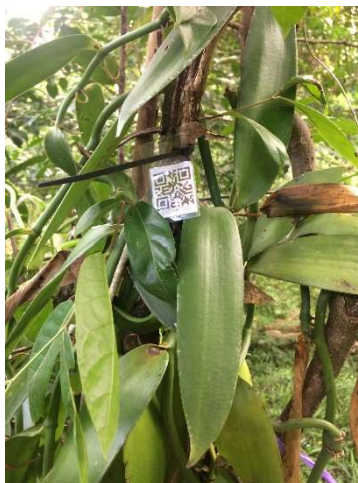

215

216 **Supplementary Figure 8:** Design on the left shows the distribution of 36 vanilla *pieds* on a 25-meter  
 217 radius plot in a vanilla agroforest (*pied* = combination of a vanilla vine and minimum one support  
 218 tree). Photo on the right shows unique barcode label on vanilla *pied*.

219



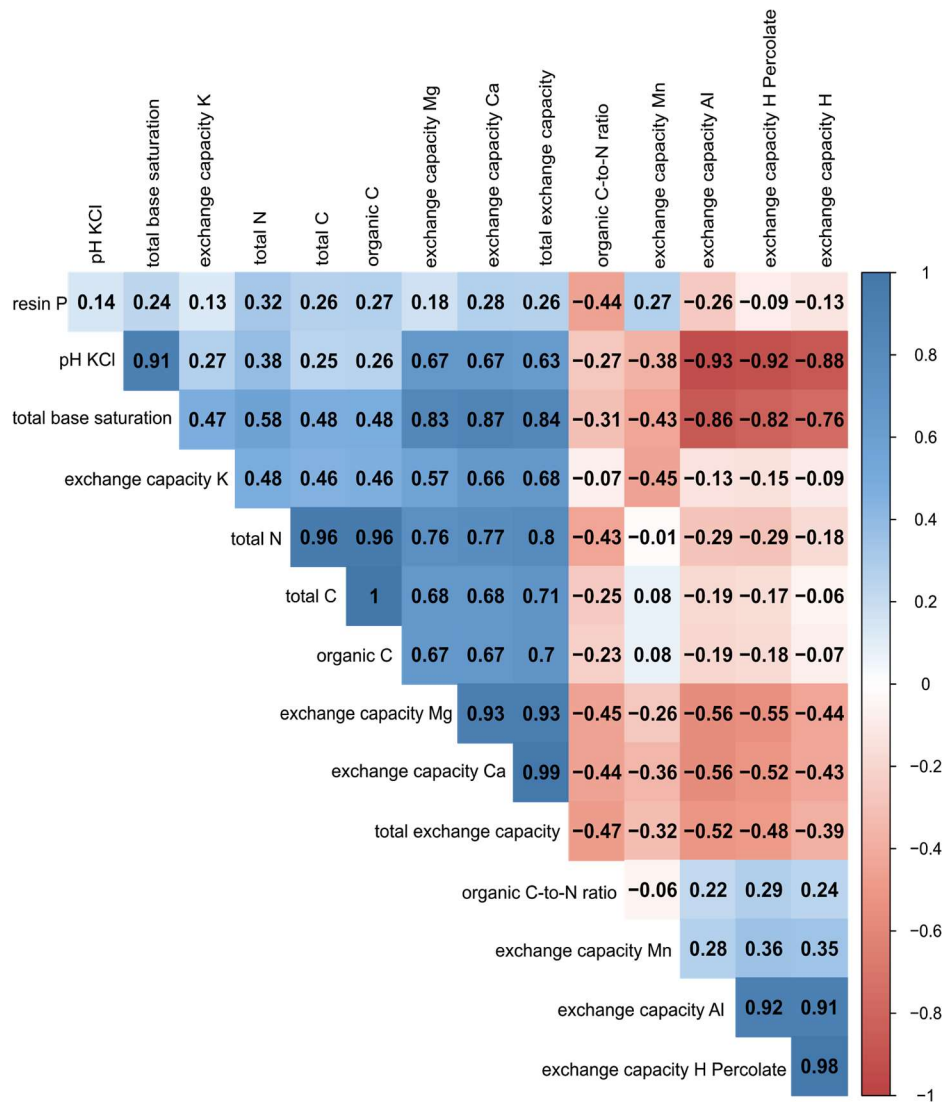

220  
 221  
 222  
 223  
 224  
 225

**Supplementary Figure 9:** Correlation matrix for all pairs of soil variables. Positive correlations are displayed in blue and negative correlations in red color. Color intensity is proportional to the correlation coefficients.

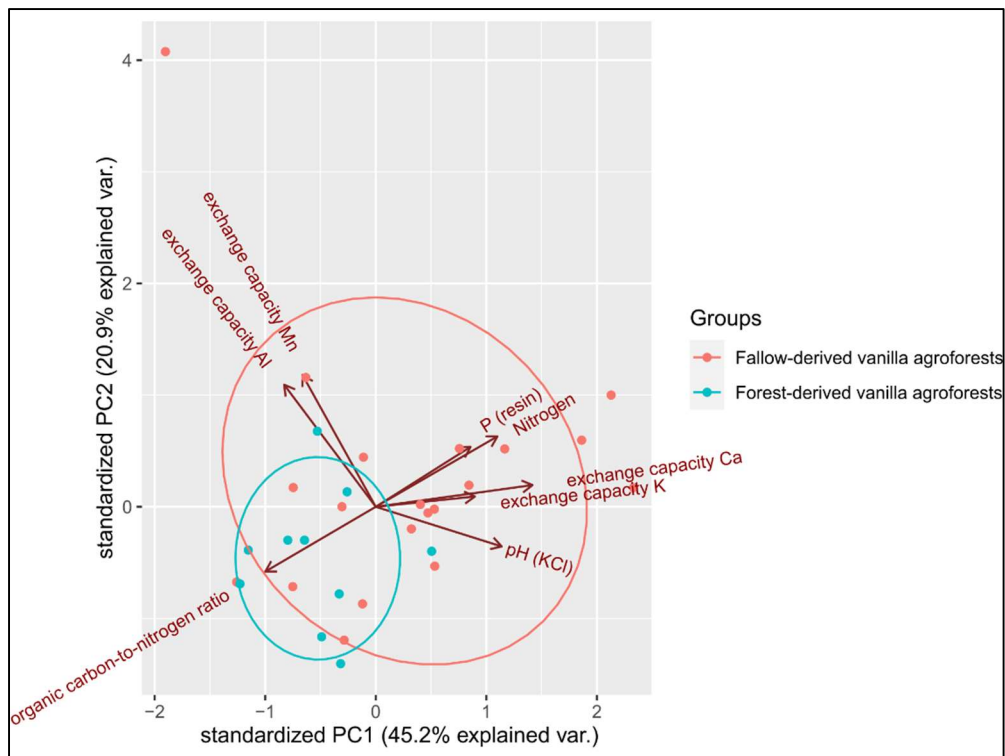

226  
 227  
 228  
 229  
 230  
 231  
 232  
 233

**Supplementary Figure 10:** PCA based on eight soil characteristics including calcium, aluminum, pH(KCl), potassium, magnesium, nitrogen, phosphorus and carbon-to-nitrogen ratio. PC1 explained 45.2% and PC2 20.9% of the variation. The red ellipse groups variation of soil characteristics in fallow-derived vanilla agroforests and the blue ellipse groups the variation of soil characteristics in forest-derived vanilla agroforests.

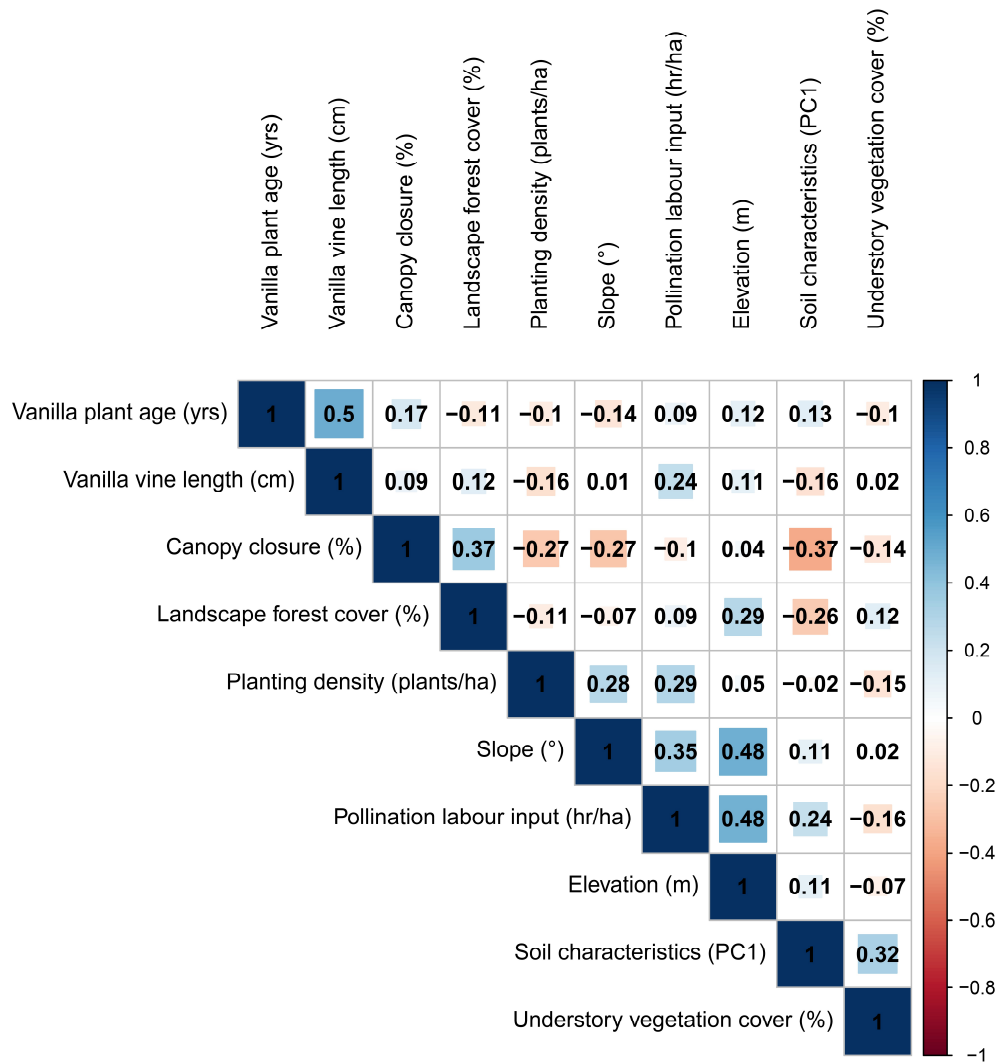

234

235 **Supplementary Figure 11:** Correlation matrix for all pairs of environmental and management  
 236 variables. Positive correlations are displayed in blue and negative correlations in red color. Color  
 237 intensity is proportional to the correlation coefficients.

238

239

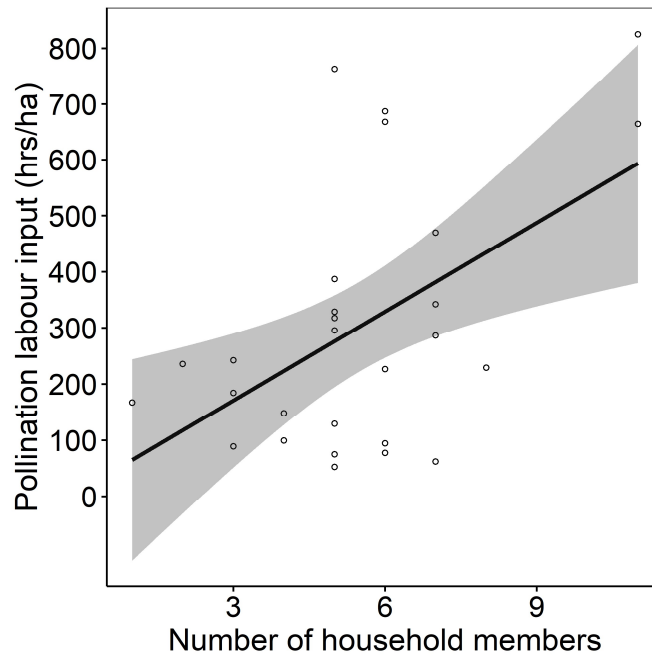

240

241 **Supplementary Figure 12:** Pollination labour input (hrs/ha) depending on the number of household  
 242 members of 30 households owning the 30 vanilla agroforests of this study using linear regression (p-  
 243 value=0.005, estimate=52.82, SE=17.38). The p-value is based on a t-test testing whether the mean  
 244 is different from 0. Dots are raw data and solid (statistically significant, p-value<0.05) trend lines  
 245 show average values of the back-transformed model prediction including a 95% confidence interval.

246
